# Supplementary material for: Fifty-year seasonal variability of East African droughts and floods recorded in Central Afar lake sediments (Ethiopia) and their connections with ENSO
Source: Copernicus journal article supplement (doi:10.5194/egusphere-2024-310), 2024-03-05
Supplement: Supplementary file [file egusphere-2024-310-RC1-supplement.pdf]

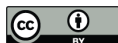

1 **Fifty-year seasonal variability of East African droughts and floods recorded in Central**  
2 **Afar lake sediments (Ethiopia) and their connections with ENSO**

3  
4 Carlo Mologni <sup>1\*</sup>, Marie Revel <sup>1</sup>, Eric Chaumillon <sup>2</sup>, Emmanuel Malet <sup>3</sup>, Thibault Coulombier  
5 <sup>2</sup>, Pierre Sabatier <sup>3</sup>, Pierre Brigode <sup>1</sup>, Gwenael Hervé <sup>4</sup>, Anne-Lise Develle <sup>3</sup>, Laure Schenini <sup>1</sup>,  
6 Medhi Messous <sup>1</sup>, Gourguen Davtian <sup>6</sup>, Alain Carré, <sup>6</sup>, Delphine Bosch <sup>7</sup>, Natacha Volto <sup>2</sup>,  
7 Clément Ménard <sup>5</sup>, Lamy Khalidi <sup>6</sup>, Fabien Arnaud <sup>3</sup>

8  
9 <sup>1</sup> Université Côte d'Azur, CNRS, OCA, IRD, Geoazur, 250 rue Albert Einstein, 06500 Valbonne,  
10 France.

11 <sup>2</sup> University of La Rochelle, UMR CNRS 7266 LIENSs, La Rochelle, France.

12 <sup>3</sup> Environnement Dynamique et Territoire de Montagne (EDYTEM), CNRS, Université Savoie Mont-  
13 Blanc, Le Bourget du lac, France.

14 <sup>4</sup> Laboratoire des Sciences du Climat et de l'Environnement/IPSL, CEA, CNRS, UVSQ, University of  
15 Paris-Saclay, Gif-sur-Yvette, France.

16 <sup>5</sup> EPCC, Centre Européen de Préhistoire, Avenue Léon-Jean Grégory - 66720 – Tautavel, France

17 <sup>6</sup> Université Côte d'Azur, CNRS, CEPAM – UMR 7264, 24 av. des Diables Bleus 06300 Nice, France.

18 <sup>7</sup> Géosciences Montpellier, UMR-CNRS 5243, Université de Montpellier, 34095 Montpellier, France

19 \*Corresponding author

20  
21 **Abstract**

22 Understanding past and present hydro-system feedbacks to global ocean-atmospheric interactions  
23 represents one of the main challenges to preventing droughts, extreme events and related human  
24 catastrophes in the face of global warming, especially in arid and semiarid environments. In eastern  
25 Africa, the El Niño-Southern Oscillation (ENSO) was identified as one of the primary drivers of  
26 precipitation variability affecting water availability. However, the northern East African Rift System  
27 (EARS) still suffers from ENSO climate teleconnection and the underrepresentation of predictive  
28 models because of the scarcity of local-to-regional historical or palaeo-data.

29 In this paper, we provide a 50-year seasonal flood/drought chronicle of the Awash River catchment from  
30 the study of laminated sediment from Gemeri and Afambo lakes (Central Afar region, Ethiopia), with  
31 the aim of reconstructing the magnitude of regional hydro-climatic events. **Pluri-centimetric micro-**  
32 **laminated lithogenic facies alternating with pluri-millimetric carbonate-enriched facies are investigated**  
33 **in both lakes.** We couple dating methods including radiocarbon, short-lived radionuclides,  
34 palaeomagnetic field variations and varve counting on both lake deposits to build a high-resolution age  
35 model and to discuss the regional hydro-sedimentary dynamics of the Awash River over the last ~700  
36 years, with a focus on the last fifty years.

37 Using a multiproxy approach, we observe that following a multi-centennial enhanced hydrological  
38 period, the two lakes experienced a gradual decrease in river load inflow since 1979 CE, attaining  
39 extreme drought and high evaporative conditions between 1991 and 1997 CE. In 2014, the construction  
40 of a dam and the improvement of agricultural hydraulic management in the lower Awash River plain  
41 impacted the erodibility of local soils and the hydro-sedimentary balance of the lake basins, as  
42 evidenced by a disproportionate sediment accumulation rate.



43 Comparison of our **quantitative reconstruction** with i) lake water surface evolution expressed in Km<sup>2</sup>,  
44 ii) the interannual Awash River flow rates expressed in mm/yr, and iii) the El Niño 3.4 model highlights  
45 the intermittent connections between ENSO **SST** anomalies, regional droughts and hydrological  
46 conditions in the northern EARS.

## 47 **1 Introduction**

48 According to the Sixth Assessment Report of the Intergovernmental Panel on Climate Change (IPCC),  
49 climate warming has been more rapid in Africa in recent decades than in any other region of the world  
50 (IPCC, 2022). Global climate projections further suggest that the Horn of Africa will experience strong  
51 disturbances of its usual hydrological cycle, with both increasing frequency of intense rainfall events  
52 leading to enhanced flash-flood hazards and a generalized scarcity of rainfall, leading to frequent severe  
53 drought episodes (Palmer et al., 2023). Such climatic instability may induce the collapse of the local  
54 food production system, leading to famine, as it occurred in the decades between 1970 and 1990 (FAO,  
55 2000). More recently, the shorter-than-normal 2021 rainy season led to a 70% reduction in average  
56 precipitation compared with seasonal norms, which raised an international alert and mobilization for the  
57 mitigation of desertification processes in the Horn of Africa (FAO, 2022).

58 Facing such evidence, eastern Africa is currently the focus for understanding recent (Holocene scale)  
59 past climate dynamics (Lennard et al., 2018) to simulate future projections, support regional ecosystem  
60 sustainability (Niang et al., 2014) and reduce rural population vulnerability to climate warming (FAO,  
61 2022). Palaeoclimatic reconstructions have long been used to understand past climate variability to build  
62 more robust future climatic models in Africa. Even if global climate and hydrological model simulations  
63 have made considerable progress, reconstructions or tendencies of future precipitation and atmospheric  
64 dynamics in eastern Africa - source of moisture fluxes from the Atlantic or Indian Oceans (Marzin and  
65 Braconnot, 2009) - which affect continental hydrology at the regional-to-local scale remain to be  
66 developed (Dosio et al., 2019; Lennard et al., 2018). Indeed, the lack of widespread regional-to-local  
67 palaeoclimatic data makes it difficult to establish regional climatic models and the link between global  
68 hydroclimate variability and the functioning of specific hydro-systems.

69 In East Africa, precipitation variability is influenced by multiple interactions between patterns of remote  
70 climate forcing, regional circulation and local geographic factors acting at local and global scales  
71 (Nicholson, 2017). At a wider scale, the El Niño-Southern Oscillation (ENSO) was identified as one of  
72 the primary drivers of precipitation in eastern Africa (Ficchi et al., 2021; Nicholson, 2017; Palmer et al.,  
73 2023). More research on regional and high-temporal resolution relationships between ENSO and  
74 flood/drought impacts in the present and in the past is increasingly needed (Ficchi et al., 2021; Ward et  
75 al., 2014). With the aim of filling this gap, this paper focuses on the acquisition of new hydro-  
76 sedimentary datasets (i.e., decennial to seasonal scale resolution) thanks to the study of lacustrine  
77 sedimentary sequences from one of the wider river catchments in the northern East African Rift System  
78 (EARS), namely the Awash River basin (Fig. 1).



79 As flood occurrence and magnitude of the Awash River are mainly linked to fluctuation of the Ethiopian  
80 Highland precipitation regime over time, the establishment of regional flood chronicles from natural  
81 archives is key to evaluating the evolution of precipitation variability on land (Ficchi et al., 2021;  
82 Mologni et al., 2020; Wilhelm et al., 2022). Of all of the natural archives for hydrological reconstruction,  
83 lakes are privileged because they act as natural sinks, continuously trapping erosion products from an  
84 entire catchment over a long period (Sabatier et al., 2022; Wilhelm et al., 2018). Indeed, during flood  
85 events, water-transported detrital particles (or sediment discharge) are deposited on the lake bottom in  
86 the form of graded layers that differ from the intra-lake sedimentation related to lake productivity. Thus,  
87 lake sedimentary deposits are valuable to fully understand the relationships between hydroclimate,  
88 rainfall, floods, droughts and lake water conditions at the regional scale.

89 This paper presents the results from a multiproxy study combining a seismic survey with  
90 sedimentological and geochemical analyses performed on archives from the Afambo and Gemeri lakes  
91 located in the Abhe lake basin (Central Afar Region, Ethiopia, Fig. 1). The main objective of this study  
92 is to quantify variations of long-term Awash solid sedimentary discharges to establish regional flood  
93 activity and to reconstitute the hydrological regime of the Awash River. Moreover, human activities can  
94 also play a key role in sediment availability, which is a function of soil erodibility and transport  
95 processes (Arnaud et al., 2016; Arnaud and Sabatier, 2022; Bajard et al., 2017, 2016; Syvitski et al.,  
96 2022). We aim first to identify the hydro-sedimentary processes in the Afambo and Gemeri Lake basins  
97 (Central Afar Region, Ethiopia) under human and hydroclimate/meteorological forcing over the long-  
98 term. Finally, we compare these flood and drought chronicles with global ENSO records and discuss  
99 the interaction between atmospheric anomalies, droughts and hydrological conditions in the northern  
100 EARS.

## 101 **2 Study site: hydrological and geomorphological settings**

### 102 **2.1 Regional hydroclimatic patterns**

103 The Abhe Lake basin, located at the northern extremity of the EARS (~12° N), is the widest and longest  
104 rifting-controlled sedimentary basin of the Afar Rift System (Fig. 1A). It corresponds to the topographic  
105 depression of the lower Awash valley (Fig. 1B) consisting of an area of 6 000 km<sup>2</sup> (Mologni et al.,  
106 2021). The Central Afar Region is currently a desert receiving ~400 mm/yr of local precipitation (Fig.  
107 1D) with a mean annual evapotranspiration of ~2000 mm/yr (Fig. 1E). In such a dry context, the  
108 permanency of waterbodies such as lakes Gemeri and Afambo (Fig. 1C) is mainly supported by their  
109 hydrological dependence on permanent Awash River water supplies originating in the Ethiopian  
110 highlands (mean annual precipitation ~1000 mm/yr; Fig. 1D), whereby the hydrological regime is  
111 dominated by seasonal rainfall pertaining to the southwest African monsoon. With a drainage basin  
112 surface of over 112,700 km<sup>2</sup>, the Awash River has an annual runoff of 4.6 BM<sup>3</sup>. However, 72% of it is  
113 lost to evapotranspiration in the lowlands (Taddese et al., 2010).



114

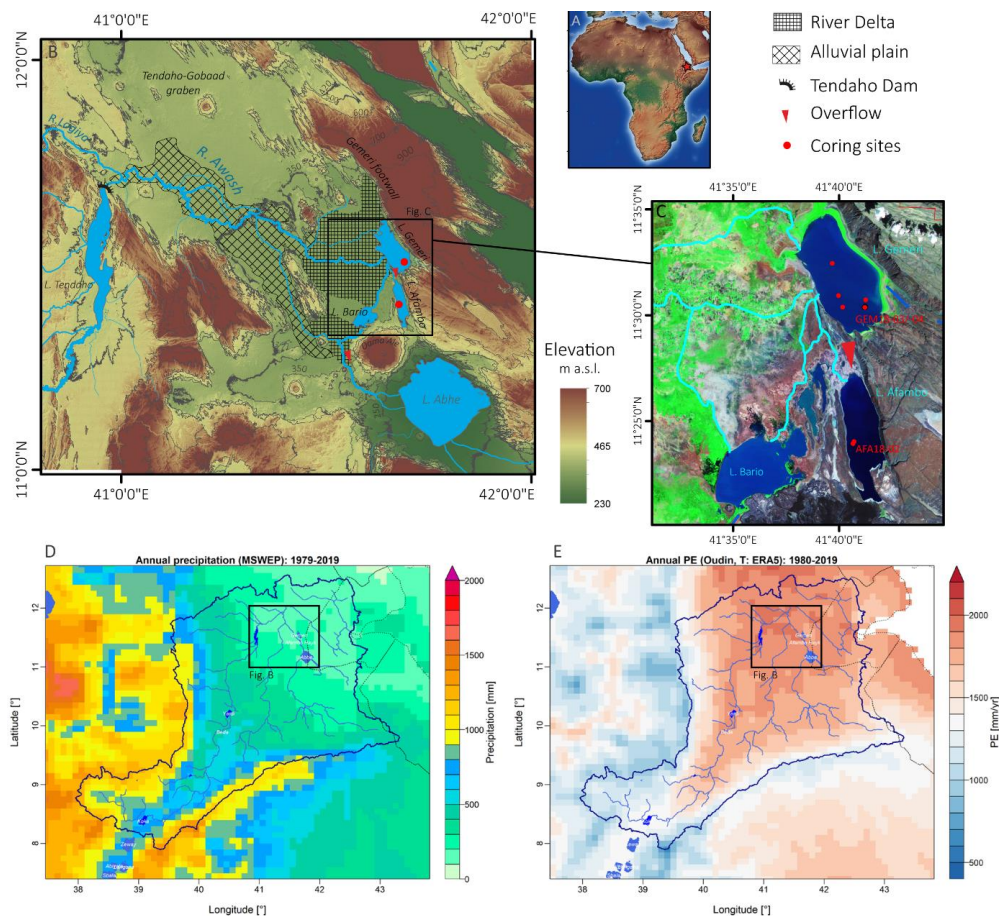

115

116 **Figure 1:** Geographical, geomorphological and hydrological contexts of the study area and coring sites. A) Location of the  
 117 Central Afar Region on a topographic map of Africa (red star); B) DEM of the Lake Abhe basin (SRTM) corresponding to the  
 118 Lower Awash Valley with the location of Gemeri, Afambo and Abhe waterbodies, the corresponding alluvial plain and the  
 119 Awash River delta, the main coring sites (red dots), the overflow directions and the Tendaho dam; C) Focus on Lakes Afambo  
 120 and Gemeri study sites with the location of coring sites (red dots), the local hydrographic network (light blue lines) and the  
 121 overflow direction between the waterbodies; D) mean annual precipitation over the Awash River and Lake Abhe basins  
 122 estimated over the 1979-2019 period using the MSWEP dataset Beck et al. (2019). E) Mean annual potential  
 123 evapotranspiration over the Awash River and Lake Abhe basins estimated using the Oudin et al. (2005) formula and the air  
 124 temperature of the ERA5 dataset Hersbach et al. (2020).

125 When it feeds into Lakes Gemeri and Afambo Lakes, the Awash River has only crossed recent  
 126 geological formations subsequent to the formation of the Oligocene Ethiopian basaltic trap flows. The  
 127 lower Awash Valley is mainly composed of stratoid basalts formed between 4 and 0.4 Ma (Awaleh et  
 128 al., 2016, Barberi and Varet, 1977; Varet, 2018) and intra-graben Quaternary accumulations, which still  
 129 belong mainly to the Stratoid series group.



## 130 **2.2 Local geomorphological context**

131 The northern part of the Lake Abhe basin is composed of an alluvial plain corresponding to irrigated  
132 agricultural fields and extended anthropogenic water channels, and a lobate delta in its lower part (Fig.  
133 1b). The remaining edges of the basin are composed of desert plains and basaltic/rhyolitic outcrops that  
134 constitute the Tendaho-Gobaad graben horsts (Fig. 1b). The delta fan spreads ~60 km from the northern  
135 Gemeru footwall fault through the Gemeru and Bario waterbodies until the Dama Ale volcano slopes to  
136 the south (Fig. 1b).

137 The Awash freshwater supplies first reach Lake Gemeru (11°51'N, 41°69' E), and overflowing into Lake  
138 Afambo (11° 40' N, 41° 68' E). In contrast to Gemeru, Lake Afambo is not located on the delta fan and  
139 does not possess any aerial estuary (Fig. 1B, C). Indeed, Afambo Lake is reached during the dry season  
140 by a single water channel and is permanently separated from the deltaic swamps by north-south basaltic  
141 outcrops (Fig. 1c, 2a). The rest of the Awash water supply is drained by the delta to the Bario waterbody  
142 and to the terminal river channel that flows down to Lake Abhe (Fig. 1B, C).

143 The local hydrological network led us to select two complementary coring sites for this study: Lake  
144 Gemeru, which borders the prodeltaic zone, mostly records the sedimentary signal from fluvial dynamics  
145 (Awash River solid load), and Lake Afambo, which is partially disconnected from deltaic dynamics, has  
146 the potential to record fine-grained sediment inputs, lacustrine primary productivity processes and to  
147 preserve the sedimentary record from hiatuses due to deltaic erosional dynamics.

148 The hydrological network of the Lower Awash River plain has been modified by the building of a dam  
149 for the agricultural development of this area conducted by the "Tendaho Dam and Irrigation Project"  
150 (Dereje et al., 2018; Kidane et al., 2014). The dam is located upon entry of the Awash River waters into  
151 the Lake Abhe basin area (Fig. 1b). The construction project began in 2010, and the dam started working  
152 in early 2014. Such massive infrastructure has led to the formation of the Tendaho artificial lake (Fig.  
153 1b) and the current network of irrigation channels in the alluvial plain.

## 154 **3 Materials and methods**

### 155 **3.1 Analysis of the water surface evolution of Lake Gemeru from satellite** 156 **images (1984 – 2019)**

157 We conducted imagery analyses of the water surfaces of Lakes Gemeru and Afambo from 1984 to 2021.  
158 We used the "Global Surface Water" dataset from the Copernicus Programme, which was generated  
159 using 4,716,475 scenes from Landsat 5, 7, and 8 acquired between March 1984 and December 2021 by  
160 Landsat satellites provided by the USGS and NASA. The dataset contains maps of the location and  
161 temporal distribution of surface water from 1984 to 2021 at 30 m resolution and provides statistics on  
162 the extent and change of those water surfaces. For more information, refer to the associated journal



163 article by [Pekel et al. \(2016\)](#). From this dataset, we computed statistics about the extent and change of  
164 the water surfaces. Using Envi software, version 5.4, we created a Meta image with the 37 water surface  
165 maps from 1985 to 2021 and generated statistics for the Meta image, which were then exported.  
166 However, for the years 1988, 1989, 1990, 1992, 1993, 1996, and 1997, the “Global Surface Water”  
167 dataset algorithm failed to concretely calculate the water surfaces, resulting in imprecise or missing data.  
168 As a result, we employed the quality assessment (QA) band in Landsat 5 images, which provides  
169 information on features such as clouds, shadows, ice, bare land, and water. Classification  
170 algorithms were applied to assign binary values to bits in the QA band based on pixel characteristics.  
171 By importing archives from the USGS and utilizing the Pixel\_QA band associated with the available  
172 images, a water mask was created. This water mask allowed us to perform zonal statistics using ArcGIS  
173 Pro 3.0.3.

## 174 **3.2 Seismic survey**

175 In December 2018, a seismic reflection survey was conducted in the southernmost part of Lake Gomeri  
176 with the aim of exploring the internal architecture of the lake sedimentary fill and choosing the location  
177 of the coring site. The acquisition of 12 seismic profiles of Lake Gomeri ([Fig. S1, S2](#)) was performed  
178 using an IxBlue ECHOES 5000 CHIRP echo-sounder (LIENSs laboratory, La Rochelle, France). Chirp  
179 frequency band 2000 - 8000 Hz was selected, with a chirp length of 50 ms. Chirp data processing  
180 included auto grain control, time varying gain, staking of adjacent traces, and swell filtering.

## 181 **3.3 Coring of Gomeri and Afambo Lakes**

182 In December 2018, 10 short sedimentary cores were retrieved from Lakes Gomeri and Afambo during  
183 the CLIMAFAR 2018 survey. Shorter cores were retrieved using a UWITEC gravity corer, while a  
184 homemade modified Nesje-like corer permitted us to reach slightly more than 2 m sediment depth in  
185 Lake Gomeri ([Fig. 1c](#)). Details about the coring operations can be found on the French National  
186 Cybercatheque (<https://cybercarotheque.fr/index.php?ope=530>).

187 We focused the present study on cores collected in the deepest part of each lake, i.e., GEM18-03 (length  
188 144 cm, IGSN number TOAE0000000354) and GEM18-04 (209 cm, IGSN number:  
189 [TOAE0000000356](#)) taken at 6 m water depth in Lake Gomeri, and AFA18-02 (173 cm, IGSN number  
190 TOAE0000000348) taken in Lake Afambo at 18 m water depth. GEM18-04 was cut into two parts in  
191 the field, and only the deepest part (109-209 cm below lake floor) of the overlapping core GEM18-03,  
192 was studied here. Core sections were split length-wise, photographed at high resolution, and described  
193 and logged in detail using the Munsell colour chart at the EDYTEM sedimentary lab facility. The  
194 identification of specific layers on the overlapping sections GEM18-03 and GEM18-04B together with  
195 the comparison of XRF core scanner and magnetic susceptibility signals led us to propose a 2.2 m long  
196 composite sediment sequence from Lake Gomeri, hereafter called GEM18-03/04.



### 197 **3.4 Analytical methods**

#### 198 **3.4.1 XRF core scanner on soft sediments, ICP–MS measurements and clay** 199 **mineralogy**

200 To characterize the variation in major elements throughout cores GEM18-03/04 and AFA18-02, we  
201 performed non-destructive X-ray fluorescence (XRF) geochemical analyses on an AVAATECH Core  
202 Scanner at the EDYTEM laboratory (CNRS-Université de Savoie Mont-Blanc, France). The XRF  
203 analyses were performed following a 1 mm sampling step for the AFA18-02 section A, 2 mm for the  
204 lower section B (live time = 20s), and 5 mm for the GEM18-03/04 core. At each step, two successive  
205 measurements were performed at 10 kV (0.12mA) and 30 kV (0.15mA) voltages to assess the  
206 contribution of lighter (Al, Si, S, K, Ca, Ti, Mn, Fe) and heavier (Br, Sr, Rb, Zr, Pb) elements,  
207 respectively. Each individual power spectrum was transformed by deconvolution into relative contents  
208 of each computed element expressed in counts per second (cps). XRF data were subsequently  
209 transformed with a Centred Log-Ratio transformation package on R© software, with the aim of  
210 circumventing problems associated with matrix effects (e.g., variable water content and grain-size  
211 distribution) and irregularities of the core surface (Weltje and Tjallingii, 2008).

212 **Principal component analysis (PCA) was performed on the XRF results using R© software (Sup. Mat.**  
213 **C) with the aim of characterizing the main geochemical signatures of particles composing the GEM18-**  
214 **03/04 and AFA18-02 sediments.**

215 Major and trace element analyses were performed with a Quadrupole ICP–MS (AETE-ISO platform,  
216 Geosciences Montpellier, France) on 500 mg of powdered and homogenized sediment sample for 6  
217 discrete samples in the GEM18-03/04 core and 11 discrete samples from the AFA18-02 core (Rauch et  
218 al., 2006).

219 X-ray diffraction analyses on clay minerals were performed on 5 samples from the GEM18-03/-04  
220 sequence at the LHyGS laboratory CNRS-UMR7517 (Strasbourg, France) (Sup. Mat. F). Sediments  
221 were treated with HCl (10%) solution to avoid any carbonate content. Suspended clay fractions were  
222 separated following the procedure in Jackson (2005) and mounted on thin sections for oriented clay  
223 XRD analyses. With the aim of acquiring the whole diffraction spectrum, four diffractograms were  
224 obtained using a D8-Advance-Eco machine from the same sample with normal treatment, ethylene-  
225 glycol treatment, hydrazine treatment, and heat treatment for 4 h at 490°C. The semiquantitative content  
226 of clay minerals (%) was obtained from MacDiff version 4.1.2 software as a 2q° counts per second (cps)  
227 spectrum area measurement.

#### 228 **3.4.2 Sedimentological analyses**

229 Grain-size analyses were performed at the Geoazur laboratory using a Coulter-LS2000 with a size range  
230 between 0.005 µm and 3775 µm. The analysis was performed following a 2.5 mm sampling step for the  
231 AFA18-02 core. We determined the grain size of the intercepts for 10%, 50% and 90% of the cumulative  
232 grain size curves (named Q90, Q50 and Q10 values; Folk and Ward, 1957). We use the coarsest fraction



233 (Q90) to characterize the deposit energy and to propose a hydrodynamic interpretation as suggested by  
234 [Wilhelm et al., \(2018\)](#).

235 Optical microscopic analyses were focused on 8 thin sections (10 x 2 cm) sampled from the AFA18-02  
236 sequence and processed at the litho-preparation facilities of the EDYTEM laboratory ([Arnaud and](#)  
237 [Sabatier, 2022](#)). Microscopic observations were obtained on a Leica DM4 P at the Geoazur Laboratory  
238 at 25x and 1000x magnification using plane-polarized (PPL), crossed-polarized (XPL) and oblique  
239 incident (OIL) lights.

### 240 **3.4.3 Chronology of Gemeri and Afambo Lake sequences**

241 On the GEM18-03/04 sediment sequence, we combined short-lived radionuclides,  $^{14}\text{C}$  measurements  
242 and palaeomagnetic analyses to build a reliable age-depth model along the 2.2 m of the composite  
243 section. A continuous sampling step of 6 cm was applied over the uppermost 66 cm of GEM18 to  
244 determine  $^{210}\text{Pb}$ ,  $^{226}\text{Ra}$  and  $^{137}\text{Cs}$  activities using well-type germanium detectors (SAGe Well) located  
245 below 1700 m of rocks at the “laboratoire souterrain de Modane” (CNRS-Université Grenoble Alpes)  
246 to reduce the influence of cosmic rays on gamma measurements (Reyss et al., 1995). **Radionuclide-**  
247 **based age models were computed using the *serac* R package** ([Bruel and Sabatier, 2020](#)).  $^{14}\text{C}$   
248 measurements were performed on 9 bulk organic matter and 4 shell samples ([Sup. Mat. I, Fig. S23](#))  
249 using the ARTEMIS accelerator mass spectrometry (AMS) facility at the LSCE-LMC14 laboratory  
250 (Gif-sur-Yvette, France).

251 Palaeomagnetic measurements were performed on the entirety of the GEM18-03/-04 composite section.  
252 The principle of the palaeomagnetic method is to compare the declination, inclination and relative  
253 palaeointensity (RPI) records from the dated core with a reference curve of the secular variations in the  
254 geomagnetic field ([Crouzet et al., 2019](#); [Haberzettl et al., 2019](#); [Li et al., 2021](#); [Ólafsdóttir et al., 2013](#)).  
255 Measurements were performed at the LSCE on u-channels sampled from the center of the GEM18-03  
256 and GEM18-04B half cores. The direction of the characteristic remnant magnetization (ChRM),  
257 assumed to be a detrital remnant magnetization (DRM) acquired during the deposition of the sediment,  
258 was determined after alternating field (AF) demagnetization. The rock magnetic properties were  
259 investigated on u-channels from measurements of low-field susceptibility, acquisition and  
260 demagnetization of ARM and IRM, coupled to thermomagnetic, hysteresis curves and first order  
261 reversal curves (FORC) on 9 discrete samples. The full protocol is detailed in the supplementary  
262 material ([Sup. Mat. D](#)).

263 The age depth model of the AFA18-02 sequence was constrained by a combination of short-lived  
264 radionuclides,  $^{14}\text{C}$  measurements and **seasonal varve/laminae counting along the core sequence**. A  
265 continuous sampling step of 10 cm was applied over 173 cm of the AFA18-02 sequence to determine  
266  $^{210}\text{Pb}$ ,  $^{226}\text{Ra}$  and  $^{137}\text{Cs}$  activities. The  $^{14}\text{C}$  measurements were performed on 9 organic matter samples at  
267 the ARTEMIS facility, including 2 vegetal macro-remains and 2 fish bone samples using  
268 ECHoMICHADAS, the Micro Carbon Dating System of the LSCE laboratory ([Table 1](#)).





### 269 **3.5 Rainfall-runoff modelling**

270 Observed streamflow time series at Tendaho Lake were extracted as daily timesteps from the GRDC  
271 dataset (*station ID: 1577603, 11.683 N, 40.950 E, catchment area: 62 088 km<sup>2</sup>, owner of original data:*  
272 *Ethiopia - Ministry of Water Resources, Hydrology Department*). This time series is only available for  
273 the 1990-2004 period, with numerous missing data during the 1994-1996 and the 2003-2004 periods.  
274 To extend the temporal extension of the streamflow series, a rainfall-runoff model was used. The  
275 monthly rainfall-runoff model GR2M (Mouelhi et al., 2006) was used using the airGR R package (Coron  
276 et al., 2022, 2017). This conceptual and lumped model needs two continuous climatic time series as  
277 inputs, precipitation (P) and potential evapotranspiration (E). GR2M has two parameters that need to be  
278 calibrated for each studied catchment (cf. model diagram in [Supp Mat. B, Fig. S3](#)). The NOAA 20CR  
279 (v3, Slivinski et al., 2019) climatic reanalysis was extracted over the Awash River catchment at Tendaho  
280 Lake to generate a monthly time series of precipitation and air temperature over the 1836-2015 period.  
281 A monthly potential evapotranspiration time series was then estimated using the 20CR air temperature  
282 time series and the Oudin et al. (2005) formula. The model parameters were automatically calibrated  
283 using the Nash and Sutcliffe (1970) objective function over the 1990-2014 period, with an initialization  
284 of the model reservoirs during the 1980-1989 period. Finally, the GR2M model parameters obtained for  
285 the Awash River at Tendaho Lake were used over the 1836-2015 period to simulate streamflow over  
286 this period.

## 287 **4 Results**

### 288 **4.1 Seismic reflection imagery on Lake Gemeri**

289 Our chirp profiles provide a display of the bathymetry of Lake Gemeri for the first time. The average  
290 measured water depth is 3 m with a maximum of 6 m in the southern part of the lake. Afambo Lake is  
291 deeper, with a maximum depth of 18 m. The shallow depth (3 m on average) and very gentle slope of  
292 Lake Gemeri are consistent with its location in the prodeltaic area of the Awash Plain.  
293 Unfortunately, seismic penetration in Lake Gemeri is reduced to a few decimetres. Within the central  
294 and eastern parts of the lake, an approximately 80 cm-thick upper sheet drape unit lies on a low-  
295 amplitude reflector parallel to the lake bottom (profile 006, [Fig. 2b](#)). On the western part of the Gemeri  
296 Lake, the upper sheet drape unit lies on a relatively strong amplitude reflector displaying a succession  
297 of small highs and lows (few meters to tens of meters wide and a few decimetres deep) showing the  
298 morphology of an erosional surface (profile 009, [Fig. 2c](#)). The succession of highs and lows along this  
299 erosional surface correspond to small channels indicating periods of drying of the lake. Below these  
300 reflectors, an extensive acoustic turbidity facies showing similarities with gassy facies (Bertin and  
301 Chaumillon, 2005; Garcia-Gil et al., 2002) is observed. Five measurements of total organic carbon from  
302 core GEM18-03 on 2 m of sediment indicate values of approximately 8.5% ([Sup. Mat. E](#)), which



303 suggests that the gas could have come from the decomposition of organic matter (algae or upper  
 304 vegetation) in the lake. The presence of gas in the Lake Gemberi sediment is likely, given the high organic  
 305 productivity in this lake and the high content in organic matter in the sampled sediments and  
 306 sequestration of organic matter that often occurs in anoxic fine sediments (Bertin and Chaumillon, 2005;  
 307 Garcia-Gil et al., 2002; Roussel et al., 2009).  
 308

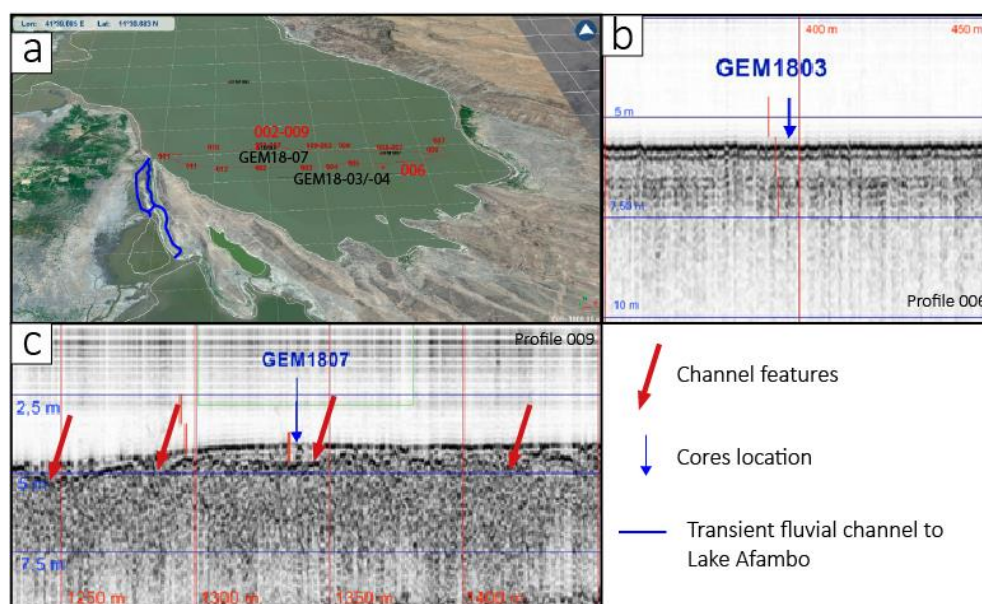

309  
 310 **Figure 2:** Seismic reflection imagery on Lake Gemberi: **a)** 3D satellite image projection of southern Lake Gemberi (LANDSAT)  
 311 with the location of the seismic profiles and of the cores reported in Figs. b and c; **b)** 006 seismic profile with the location of  
 312 GEM18-03 core (blue arrow); **c)** 009 seismic profile with the location of GEM18-07 core (blue arrow) and of channel features  
 313 (red arrows).

## 314 4.2 Sedimentology and geochemistry results

### 315 4.2.1 AFA18-02

316 The 173 cm-long sediment of AFA18-02 consists of undisturbed laminated sediments showing a clay-  
 317 silty texture (Fig. 3a.1). A median size of 3 and 7  $\mu\text{m}$  was measured at 2 mm resolution along the 173  
 318 cm of the core, indicating that the lake's sedimentation did not record any extreme coarse or erosional  
 319 event (Fig. 3a.5). Along the core, the first striking characteristic of this sequence is the succession of a  
 320 couple of distinct facies systematically composed of brownish-grey coloured pluri-centimetric layers  
 321 (Facies-1; F1) alternating with orange/brown coloured pluri-millimetric layers (Facies-2; F2) and  
 322 sometimes associated with millimetric white beds (Facies-3; F3, Fig. 3a.1, 4b.1). Thirty-two **couplets**  
 323 **were hence identified, over the entire 173 cm sediment sequence.**

324 The major element distribution measured for 11 discrete samples (Tab. 1) indicates  $\text{SiO}_2$  values  
 325 oscillating between 25 and 46%,  $\text{TiO}_2$  values between 0.7 and 1.7% and a high concentration in iron of



326 approximately 8%. Carbonate content values oscillate between 6 and 24% (Tab. 1). From the discrete  
327 samples, the coefficient of correlation between Ca and Sr is  $R^2 = 0.97$ . This suggests that the source of  
328 the carbonaceous component does not change along the 173 cm. Thanks to PCA analyses, 3 geochemical  
329 end members from Dim.1 (53,67%)/Dim.2 (23,43%) were differentiated (Fig. S4): The first one (EM1)  
330 yields major elements Al, Si, Fe, Ti, K, Zr and Mn with high positive loading on Dim1. The second end-  
331 member (EM2) gathers elements composing carbonates (Ca and Sr) and elements involved in the  
332 evaporitic succession of minerals (S, Mg, Na) with high positive loading on Dim2 and positive loading  
333 on Dim1. The third end-member (EM3) includes only Br negative loading on Dim1 and Dim2, which  
334 is often used as a proxy for autochthonous organic matter in lakes (Bajard et al., 2016; Lefebvre et al.,  
335 2021). The PCA factor map ascribes F1 layers into the EM1 area and the F2/F3 layers into the EM2  
336 area (Fig. S5). Consequently, we selected Ti, Sr, and Ca to geochemically characterize the F1 and F2/F3  
337 facies. A good plot correlation between CLR transform XRF and ICP-MS measured elemental values  
338 (Fig. 3b) provides reliable Sr and Ca XRF data to geochemically characterize the three different  
339 sedimentary facies along the core sequence. F1 is composed of microlaminated clays enriched in Ti, Si  
340 and Fe elements (Fig. 3b.3). The F1 thickness varies substantially along the core, with an average  
341 thickness of ~3 cm between 173 and 137 cm, a thickness of ~1 cm between 137 and 120 cm, a thickness  
342 of 3.5 cm between 120 and 80 cm, and a thickness of ~9 cm between 80 and 0 cm. F2 (0.5-1 cm  
343 thickness) is composed of microlaminated clay, diffused secondary carbonate impregnations (sparite)  
344 and sporadic Fe-Mn nodules. Geochemically, the F2 layers are slightly enriched in Ca and Sr elements  
345 (Fig. 3a, 3b). F3 (0.3-0.5 cm thickness) is composed of a massive-to-microlaminated micritic/sparitic  
346 matrix (Fig. 7b.1) strongly enriched in Ca and Sr elements (Fig. 3a, 3b).

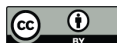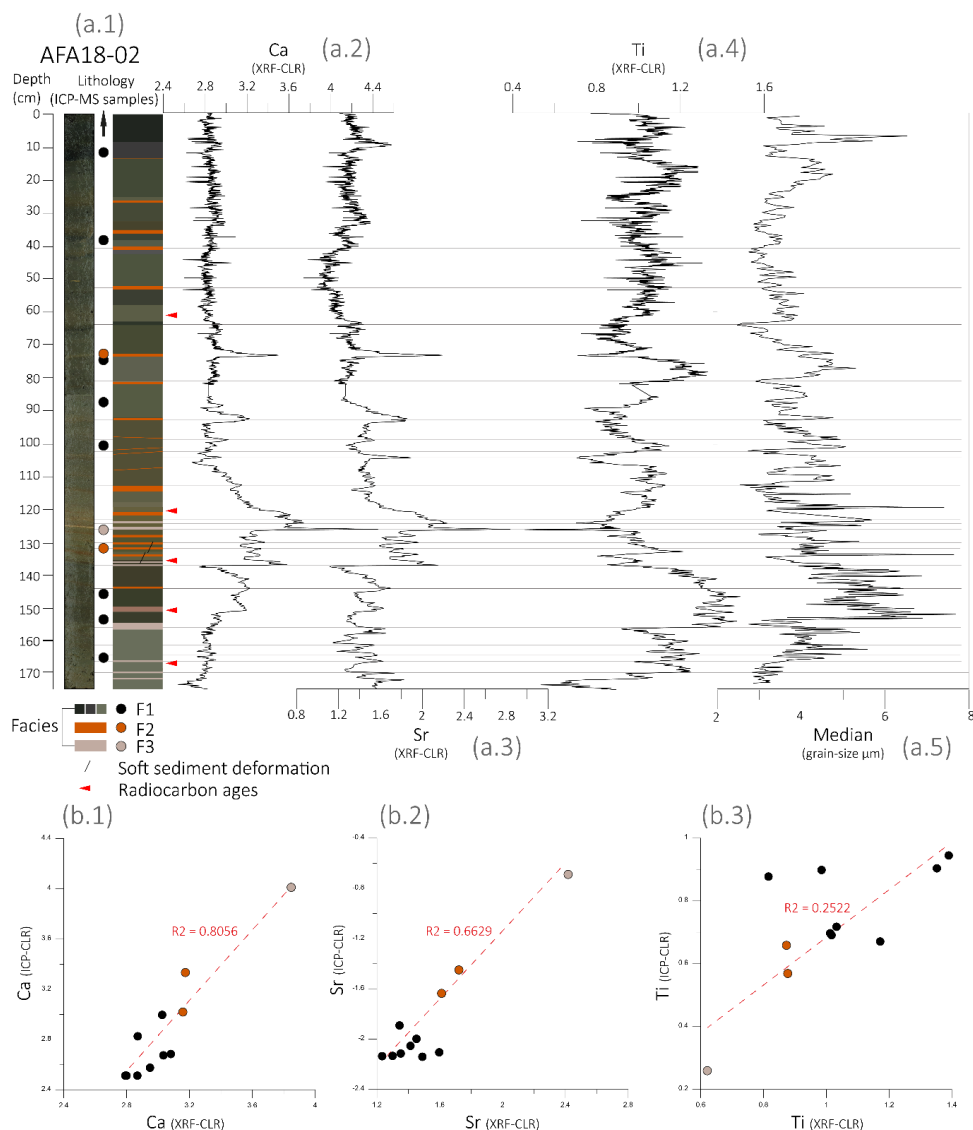

347  
 348 **Figure 3:** Geochemical (XRF and ICP-MS) and sedimentological results on AFA18-02 core: **a.1** Picture and lithology with  
 349 the location of the sampling areas for ICP-MS analyses (dots); **a.2** Ca XRF-(CLR) values; **a.3** Sr XRF-(CLR) values; **a.4** Ti  
 350 XRF-(CLR) values; **a.5** Grain size median; **b.1** Correlation plot between Ca XRF-(CLR) and ICP-MS-(CLR) values; **b.2**  
 351 Correlation plot between Sr XRF-(CLR) and ICP-MS-(CLR) values; **b.3** Correlation plot between Ti XRF-(CLR) and ICP-  
 352 MS-(CLR) values.

353 Grain size distributions indicate three general dominant modes, one sorted clay mode at approximately  
 354 1 to 2  $\mu\text{m}$ , one well-sorted mode at approximately 19  $\mu\text{m}$ , and the third is less dominant and lies in the  
 355 sortable silt range at approximately 50  $\mu\text{m}$  (Fig. 4b.3).

356 F1 layers present pronounced 1-2  $\mu\text{m}$  and 50  $\mu\text{m}$  modes, with the second represented mode at 19  $\mu\text{m}$ .

357 F2 and F3 are well sorted at approximately 40 and 126  $\mu\text{m}$ .



358

| Dept<br>(cm) | F  | Na2O | MgO  | Al2O3 | K2O  | CaO   | TiO2 | MnO  | P2O5 | SiO2  | Fe2O3<br>(T) | Cr    | Ni    | Ba     | Zr     | Sr      |
|--------------|----|------|------|-------|------|-------|------|------|------|-------|--------------|-------|-------|--------|--------|---------|
|              |    | %    | %    | %     | %    | %     | %    | %    | %    | %     | %            | ppm   | ppm   | ppm    | ppm    | ppm     |
| 12           | F1 | 1,97 | 4,62 | 13,13 | 1,85 | 6,30  | 1,50 | 0,10 | 0,28 | 45,80 | 9,57         |       |       |        | 271,65 | 423,40  |
| 39           | F1 | 1,69 | 4,44 | 12,79 | 1,83 | 6,27  | 1,21 | 0,11 | 0,28 | 43,42 | 8,67         | 71,83 | 70,30 | 306,67 | 266,19 | 430,11  |
| 72           | F2 | 1,32 | 4,35 | 10,60 | 1,43 | 14,16 | 1,06 | 0,11 | 0,26 | 36,48 | 7,30         | 59,87 | 56,34 | 371,84 | 221,51 | 847,12  |
| 73           | F1 | 1,61 | 4,17 | 12,55 | 1,83 | 7,51  | 1,48 | 0,12 | 0,27 | 42,86 | 8,73         | 72,51 | 61,19 | 319,30 | 268,68 | 450,51  |
| 90           | F1 | 1,39 | 4,08 | 11,78 | 1,92 | 8,37  | 1,14 | 0,10 | 0,26 | 42,62 | 8,26         | 72,86 | 62,70 | 287,74 | 254,22 | 480,19  |
| 100          | F1 | 0,69 | 3,34 | 12,12 | 1,47 | 9,47  | 1,13 | 0,17 | 0,26 | 41,62 | 8,21         | 71,16 | 66,15 | 300,95 | 247,09 | 397,81  |
| 127          | F3 | 0,96 | 5,28 | 6,67  | 1,01 | 23,79 | 0,67 | 0,14 | 0,19 | 25,11 | 4,57         | 39,57 | 40,49 | 399,08 | 136,28 | 1545,29 |
| 132          | F2 | 1,34 | 4,93 | 10,58 | 1,53 | 10,39 | 1,24 | 0,11 | 0,25 | 37,96 | 7,42         | 67,73 | 62,20 | 351,79 | 227,72 | 706,21  |
| 148          | F1 | 1,65 | 4,18 | 12,78 | 1,86 | 8,08  | 1,69 | 0,14 | 0,28 | 43,70 | 8,89         | 83,73 | 65,71 | 367,12 | 263,87 | 505,26  |
| 152          | F1 | 1,58 | 4,47 | 12,64 | 1,89 | 6,93  | 1,55 | 0,12 | 0,26 | 43,45 | 8,82         | 82,59 | 63,67 | 329,38 | 266,35 | 454,91  |
| 168          | F1 | 1,38 | 5,81 | 11,69 | 1,78 | 5,99  | 1,13 | 0,10 | 0,23 | 41,84 | 7,80         | 69,70 | 63,29 | 285,02 | 246,98 | 523,07  |

359 *Tab 1: Major and trace element concentrations of the AFA18-02 core.*

#### 360 4.2.2 GEM18-03/04

361 The sediment of GEM18-03/04 is homogeneously clayey (Q50 = ~2.4 μm) and dark brown in colour  
 362 (Fig. 5) all along its 220 cm. The first 15 cm are highly liquefied, presenting a clayey texture with slight  
 363 laminations. Between 19 and 40 cm, we note the presence of polyhedral clay structures. Between 38 and  
 364 222 cm, we observed a homogenous clay texture interbedded by seven layers of lacustrine shells  
 365 (*Melanooides tuberculata*), leading to a visible change in porosity at approximately 62 to 67 cm, 80 cm,  
 366 90 cm, 112-114 cm, 124 cm and 140 cm (Fig. S19).

367 The major element distribution (measured for 5 samples by ICP-MS, Table S1, S2) indicates SiO<sub>2</sub> values  
 368 between 42 and 49% and TiO<sub>2</sub> values between 1.2 and 1.5%. The carbonate content values oscillate  
 369 between 5 and 10% (Table S1, S2). The plots Si versus Al and Al versus Ca indicate an anticorrelation  
 370 between terrigenous and carbonated materials; (Fig. S20), suggesting that the carbonate particles mainly  
 371 originated from the lake and not from the terrigenous fraction supplied by the Awash flood. Similarly,  
 372 the coefficient for Ca versus Ti is anticorrelated, consequently we will represent the ratio of  
 373 terrigenous/authigenic sediment components using the Ti/Ca ratio.

374 The evolution of the Log(Ti/Ca) ratio defines 5 geochemical units (Fig. 5b.1): Unit 1 (0 to 19 cm) is  
 375 characterized by a gradual increase in Log(Ti/Ca) values. Unit 2 (40 to 19 cm) is characterized by a  
 376 gradual increase in siliciclastic elements; Unit 3 (115 to 40 cm) presents an abrupt decrease in  
 377 Log(Ti/Ca) at its base, followed by a progressive increase in Ti; Unit 4 (210 to 115 cm) is characterized  
 378 by a high lithogenic contribution; Unit 5 (222 to 210 cm) presents a high carbonate content. Between  
 379 38 and 222 cm, seven shell beds are characterized geochemically by an increase in Ca and Sr values  
 380 (Fig. S19).



381 **4.3 Chronology**

382 **4.3.1 Age model of Lake Afambo sediments**

383 The 173 cm long **AFA18-02** sediment was measured using gamma spectrometry to build an age model  
 384 based on short-lived radionuclides (Fig. 4a.2, 4a.3). The <sup>210</sup>Pb excess profile first shows a slow decrease  
 385 from the top to 105 cm and then a more rapid decrease between 105 and 170 cm until an activity of 26  
 386 mBq.g<sup>-1</sup>. The use of a logarithmic scale to plot these data underscores a poorly constrained (r<sup>2</sup>=0.2,  
 387 related to very high sedimentation rate leading to low activity decreases) single-point alignment that  
 388 shows a constant sedimentation rate of 108 mm.yr<sup>-1</sup> for the first 105.8 cm and a better constrained  
 389 (r<sup>2</sup>=0.6) single-point alignment that shows a constant sedimentation rate of 16.5 mm.yr<sup>-1</sup> between 106  
 390 and 170 cm. The change in sedimentation rate occurred in 2009 +/- 7 years. The <sup>137</sup>Cs profile shows an  
 391 increase at the bottom of 4 mBq.g<sup>-1</sup>. **This peak could be associated with the end of maximum nuclear**  
 392 **weapon tests in 1963 CE (Foucher et al., 2021; Fig. 4a.3).**

| Sample ID           | Lab ID             | Material              | Uncalibrated Age |                         | Calibrated ages             |               |
|---------------------|--------------------|-----------------------|------------------|-------------------------|-----------------------------|---------------|
|                     |                    |                       | BP ± yrs (bulk)  | F <sup>14</sup> C ± (%) | 2σ cal AD (probability)     | Median cal AD |
| AFA18-02A_10.5-11   | SacA57084          | Bulk sediment         | 315 ± 30*        |                         |                             |               |
| AFA18-02A_44        | SacA57085          | Bulk sediment         | 640 ± 30*        |                         |                             |               |
| AFA18_02A_61        | GifA20055/ECHo3328 | Fish Bone             |                  | 1.0456 ± 0.0029         | [2008.88 - 2009.58] (30.3%) | 2008          |
| AFA18-02A_61        | SacA59130          | Bulk sediment         | 610 ± 30*        |                         |                             |               |
| AFA18-02A_76        | SacA57086          | Bulk sediment         | 365 ± 30*        |                         |                             |               |
| AFA18-02B_8-8.5     | SacA57087          | Bulk sediment         | 165 ± 30*        |                         |                             |               |
| AFA18-02B_35-39     | GifA20052/ECHo3259 | Vegetal micro remains |                  | 1.0940 ± 0.0179         | [1993.78 - 2007.1] (90.3%)  | 2000          |
| AFA18-02B_50.5-51   | SacA57088          | Bulk sediment         | post 1950*       |                         |                             |               |
| AFA18-02B_51-53     | GifA20053/ECHo3260 | Vegetal micro remains |                  | 1.1364 ± 0.0123         | [1989.86 - 1996.94] (89.3%) | 1992          |
| AFA18_02B_66.5      | GifA20056/ECHo3327 | Fish Bone             |                  | 1.2069 ± 0.0031         | [1984.82 - 1986.45] (52.8%) | 1985          |
| AFA18-02B_67        | SacA59131          | Bulk sediment         | 320 ± 30*        |                         |                             |               |
| AFA18-02B_82.5-83.5 | GifA20054/ECHo3261 | Vegetal micro remains |                  | 1.2357 ± 0.0133         | [1980.8 - 1985.76A] (59.9%) | 1982          |
| AFA18-02B_81.5-82   | SacA57089          | Bulk sediment         | post 1950*       |                         |                             |               |

393 **Tab 2:** List of radiocarbon ages on bulk sediment (\*), vegetal micro remains and fish bone material. Ages with \* are  
 394 rejected. Calibration curve NH2 (Hua et al., 2013).



395 Among the 13 samples for  $^{14}\text{C}$  ages (Tab. 2), the confrontation with the  $^{210}\text{Pb}$  model shows that the  
396  $^{14}\text{C}$  age measured on the bulk sediment organic matter was older, so these ages were systematically  
397 rejected (\* in Tab. 2). The older ages could be explained by the contamination of reworked micro-  
398 organic matter particles from the Awash River catchment. A number of  $^{14}\text{C}$  analysis were measured on  
399 fish bones and on vegetal micro remains obtained from the micro sampling materials (Fig. S21 and S22).  
400 The five ages measured from fish bone and vegetal micro remains are consistent with the  $^{210}\text{Pb}$ -derived  
401 chronology and are considered viable as part of the age model (Fig. 4a.4). 32 laminae were identified  
402 and counted in the F1 and F2 couplets (Fig. 5d), which provides a  $106 \text{ mm.yr}^{-1}$  sedimentation rate that  
403 is highly comparable with the rate derived from the CFCS model ( $108 \text{ mm.yr}^{-1}$ ; Fig. 4a.2). Thus, the  
404  $^{210}\text{Pb}$ -derived age model confirms that a very high sedimentation rate compatible with the F1 layers  
405 could correspond to one season of river-borne discharge.

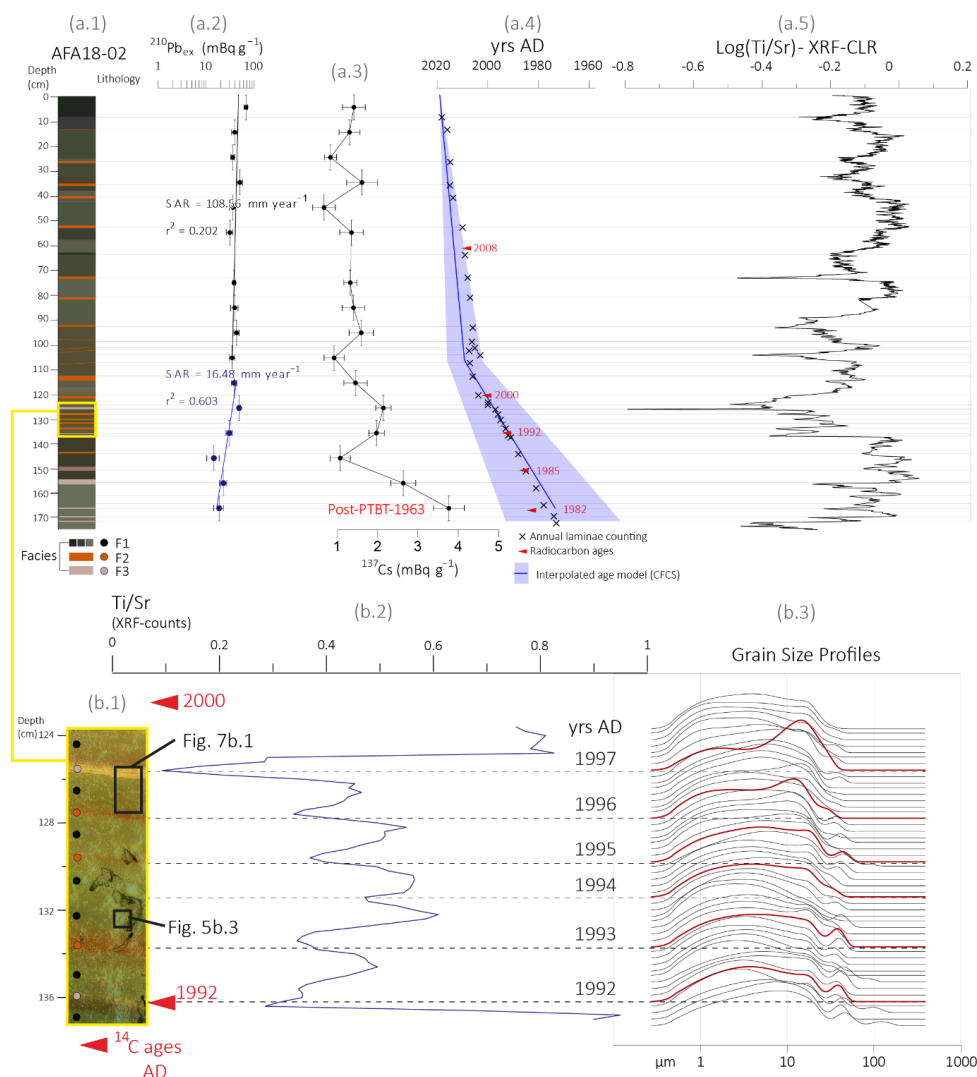

406

407 **Figure 4:** Age model of the AFA18-02 sequence: **a.1)** lithology; **a.2)**  $^{210}\text{Pb}$  activity profile ( $\text{mBq.g}^{-1}$ ); **a.3)**  $^{137}\text{Cs}$  activity profile  
 408 ( $\text{mBq.g}^{-1}$ ); **a.4)** interpolated CFCS age model with annual laminae counting (crosses) and radiocarbon ages (red arrows); **a.5)**  
 409 XRF  $\text{Log}(\text{Ti}/\text{Sr})$  ratio transformed with a Centred Log Transformation package (Weltje and Tjallingii, 2008); **b.1)** focus on  
 410 124-140 cm F1-F2/F3 couple counting; **b.2)** XRF  $\text{Ti}/\text{Sr}$  (124-140 cm) ratio curve with radiocarbon ages (red) and yrs  
 411 AD/laminae counting; **b.3)** 124-140 cm grain size profiles (each 2 mm).

#### 412 4.3.2 Age model of Lake Gemeri

413 The upper 66 cm sedimentary sequence of the GEM18-03 core was measured using gamma  
 414 spectrometry to build an age model based on short-lived radionuclides (Fig. 5a.1, 5a.2). The  $^{210}\text{Pb}$  ex  
 415 profile shows a gradual decrease from 51.8 to 7  $\text{mBq.g}^{-1}$ . The use of a logarithmic scale to plot these  
 416 activities underscores a well-constrained ( $r^2=0.8$ ) single-point alignment that shows a sedimentation rate  
 417 of 13.66  $\text{mm.yr}^{-1}$  for the first 66 cm (Fig. 5a.2). The  $^{137}\text{Cs}$  profile reaches a clear peak between 42 and  
 418 48 cm with a maximum activity  $>10 \text{ mBq.g}^{-1}$ . This peak is attributed to the maximum nuclear weapon





419 tests in 1963 CE (Foucher et al., 2021) and is in accordance with the sedimentation rate derived from  
 420 the  $^{210}\text{Pb}$ ex profile (Fig. 5a.2). Above this peak,  $^{137}\text{Cs}$  activities slowly decrease, which suggests a large  
 421 catchment area with input of  $^{137}\text{Cs}$  already deposited in surface soil and transported by active annual  
 422 floods (Fig. 5a.3). Among the 13  $^{14}\text{C}$  age samples (Sup. Mat. I), the confrontation with the  $^{210}\text{Pb}$  CFCS-  
 423 derived chronology shows that the  $^{14}\text{C}$  ages measured on organic matter are older by several thousands  
 424 of years, and are therefore rejected with regard to the age model, such as is the case for 8 ages on bulk  
 425 sediment for the Afambo core age model (Tab. 2). The five ages measured on lacustrine shells  
 426 (*Melanoïdes tuberculata*; Murray, 1975) are still older than expected except for the age at 48.5 cm (Fig.  
 427 S23).

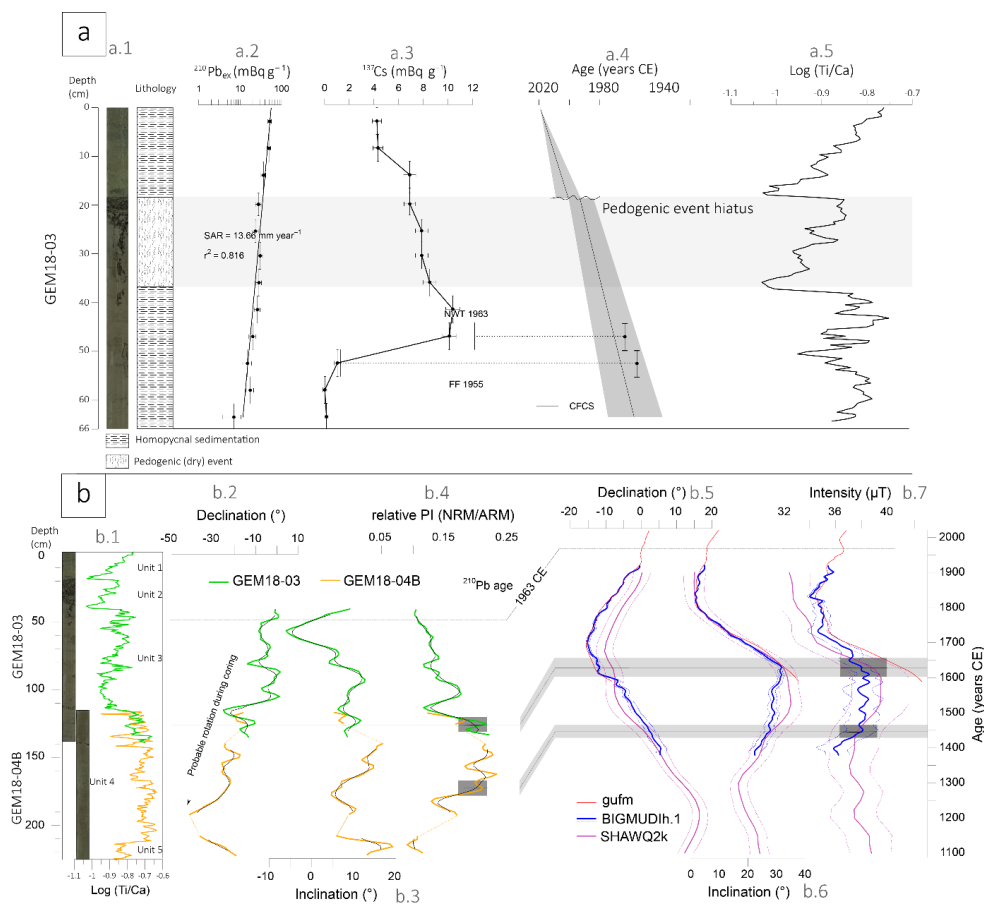

428

429 **Figure 5:** a.1) GEM18-03 upper section (first 66 cm) picture and lithology, a.2)  $^{210}\text{Pb}$ ex and a.3)  $^{137}\text{Cs}$  profiles, a.4) CFCS  
 430 interpolated age model and a.5) Log(Ti/Ca) XRF count intensity. b.1) GEM18-03/04B composite section with Log(Ti/Ca) XRF  
 431 count intensities; correlation between b.2) relative palaeo-intensity, b.2) inclination and b.2) declination measured on  
 432 GEM18-03/04B with the b.5 to b.7) prediction at Lake Gemi of three geomagnetic global models, BIGMUD1h.1 (in blue,  
 433 Arneitz et al., 2021), gufm (in red, Jackson et al., 2000) and SHAWQ2k (in purple, Campuzano et al., 2019). BIGMUD1h.1 and  
 434 SHAWQ2k.1 models are plotted with their 1- $\sigma$  uncertainty envelope. The correlation is preferentially based on the  
 435 BIGMUD1h.1 model (see text). For GEM18-03/04B, green and orange thick lines are raw results on GEM18-03 and GEM18-  
 436 04B sections, respectively, while the thinner black curves show the variation after smoothing with 8-cm sliding windows. The  
 437 two chronological tie-points are given by RPI, while the secular variation of declination, and to a lesser extent of inclination  
 438 is likely masked by disturbances during coring.



439 To better constrain the age model and investigate the sedimentation rate below the first 66 cm dated by  
440 short-lived radionuclides, we performed palaeomagnetic measurements with the objective of providing  
441 chrono-markers in accordance with the palaeosecular variation in the geomagnetic field over the last  
442 millennium (Fig. 5b; Crouzet et al., 2019). The rock magnetic and palaeomagnetic results are detailed  
443 in Sup. Mat. D. All rock magnetic results converge towards a homogeneous ferromagnetic mineralogy  
444 below 40 cm, composed of almost pure magnetite of relatively fine grain size (pseudo single domain).  
445 As the concentration in magnetic grains also does not vary significantly along the core, the magnetic  
446 properties are very favourable to the determination of the relative palaeointensity (RPI; Fig. 5b.4). The  
447 RPI results with the three possible normalizers (intensity of anhysteretic remnant magnetization ARM,  
448 intensity of isothermal remnant magnetization IRM (low-field susceptibility)) are consistent, giving us  
449 confidence in our RPI estimation even though it is based on only one core (Fig. 5b). The variations in  
450 declination, inclination and RPI below 40 cm are plotted in Figs. 5b.2 and 5b.3. They are compared to  
451 the prediction at Lake Gomeri of three geomagnetic global models: gufm (Jackson et al., 2000),  
452 SHAWQ2k (Campuzano et al., 2019) and BIGMUD1h.1 (Arneitz et al., 2021; Figs. 5b.5 and 5b.6).  
453 The correlation between the GEM18-03/04B results and the model is not straightforward. However,  
454  $^{137}\text{Cs}$  and  $^{210}\text{Pb}$  results from the top of the core allow us to propose a more solid chronological  
455 framework of the sedimentary sequence. The almost continuous decrease in declination along the core  
456 could suggest that the 190-222 cm depths could correspond to circa 1700 AD. However, the amplitude  
457 of the decrease at approximately  $40^\circ$  is much larger than that in the models (approximately  $15^\circ$ ), and we  
458 strongly suspect that the declination record is biased by a slight progressive rotation feature during  
459 coring. Short inclination oscillations in the core are not recognized in the model. Neither the inclination  
460 minimum approximately 1840 AD nor the previous fast and regular decrease from 1630 AD are clearly  
461 visible in GEM18-03/04B. Higher inclination values are in accordance with the model between 130 and  
462 160 cm.  
463 The period of higher intensity between the middle of the 15<sup>th</sup> c. and the first half of the 17<sup>th</sup> c. AD appears  
464 to be recorded between 170 cm and 125 cm in GEM18-03/04B. This feature could provide two chrono-  
465 markers to establish the age model, 120-130 cm corresponding to 1600-1650 CE and 167-177 cm to  
466 1430-1460 CE. These two proposed tie points are rather consistent with inclination variations because  
467 higher values of this parameter are observed in the two ranges of depth and age. The values of correlated  
468 depths and ages should be considered approximate regarding the envelope error on the model and  
469 because the predictions of global models are generally less reliable in intensity than in declination and  
470 inclination (e.g., Brown et al., 2021). Palaeomagnetism measurements based on a single core cannot  
471 provide a solid and high-resolution age model. However, the correlation with short-lived radionuclide  
472 measurements on GEM18-03 and with the AFA18-02 age model allows us to propose some reliable  
473 links with the Awash River hydro-sedimentary chronicles which are at decennial resolution. The  
474 palaeomagnetic measurements provide confirmation that  $^{14}\text{C}$  ages from GEM18-03/04B are too old, and  
475 that these sediments do not exceed the last millennium.



476 **4.4 Changes in water surface area at Lakes Gemeri and Afambo, 1985 -**

477 Since 1984, Landsat satellite image data have indicated that Lake Afambo experienced several  
 478 hydrological fluctuations without a complete drying of the lake. In contrast, Lake Gemeri partially dried  
 479 up starting in 1984, with a total drying up of the lake between 1990 and 1998 (Fig. 6). Then, between  
 480 1999 and 2000, the lake was completely refilled. Comparisons between hydrological, geophysical,  
 481 sedimentological and geochemical data will be discussed in the next paragraphs.  
 482

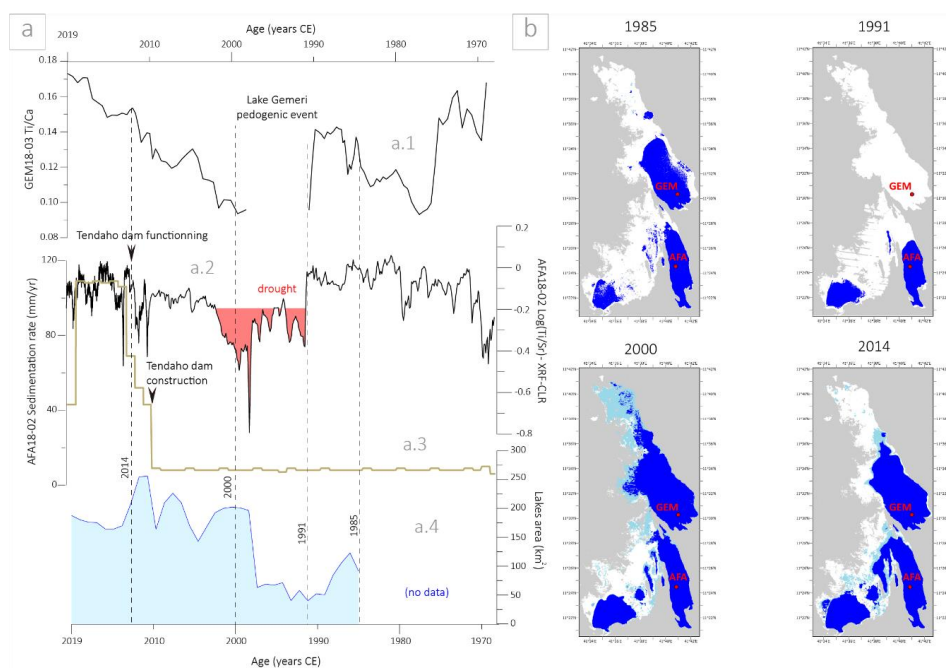

483  
 484 **Figure 6:** Hydro-sedimentary variability of Lakes Gemeri and Afambo during the last fifty years: **a.1)** Ti/Ca XRF ratio of  
 485 GEM18-03 sequence; **a.2)** Ti/Ca XRF ratio of AFA18-02 sequence; **a.3)** AFA18-02 sedimentation rate; **a.4)** lake-level area  
 486 changes since 1985; **b)** map representation of lake area changes in 1895, 1991, 2000 and 2014 CE; white = no water, light  
 487 blue = 1 month water (temporary water), blue = 12 months of water (permanent water), grey = no data.

488 **5 - Discussion**

489 **5.1- AFA18-02 F1 and F2 significance**

490 **5.1.1 – F1 interpretation**

491 In the geological context of the Afar depression and Main Ethiopian Rift (MER), Si, Ti and Ca wt %  
 492 values of AFA18-02 and GEM18-03/-04B are compared with the same values of 11 mud samples from  
 493 the Blue Nile headwaters catchment (Bastian et al., 2019) and with 20 basalt samples from the Afar and  
 494 MER regions (Ayalew et al., 2016), corresponding to the sources of the Awash River catchment (Fig.  
 495 7). The Afar lake sediments are well-ranged in SiO<sub>2</sub> wt% values and partially overlap with the TiO<sub>2</sub>



496 wt% values of the Ethiopian trap basalts and sediment sources, indicating that the origin of the  
 497 terrigenous inputs into the lakes is mainly represented by the solid discharge of the Awash River  
 498 catchment. The ~0.1% offset between the Afar lake sediments and the Ethiopian river sediments and  
 499 basalts can be attributable to a granulometric sorting effect. Similarly, the lithogenic signature  
 500 originating from the erosion of stratoid basalt series along the Awash River catchment is confirmed by  
 501 the ferromagnetic mineralogy of GEM18-03/-04B composed of almost pure magnetite (see section  
 502 §4.3.2 and Sup. Mat. D).

503 Thick layers, high organic matter content, coarser grain size (D90 peaks of 25-30  $\mu\text{m}$ , Fig. 9c) dominated  
 504 terrigenous elements (Si, Ti, Fe, Fig. 7a; EM-1 PCA, Sup. Mat. C) characterize the F1 facies, interpreted  
 505 as a product of sedimentary load inputs from the Awash River during the wet season, which is associated  
 506 with the increase in monsoonal precipitation between March and August over the catchment sources  
 507 located on the Ethiopian Highland (Fig. 1D). The F1 patterns indicate that the total water and solid load  
 508 inflow during the wet season corresponds to the formation of a particle suspended plume into the lake  
 509 waters. The lack of erosion features, the disconnection from deltaic geomorphic dynamics and the  
 510 regular mode of sedimentation (seasonal) indicate that Afambo is a basin characterized by yearly cyclic  
 511 hydrosedimentary functioning.

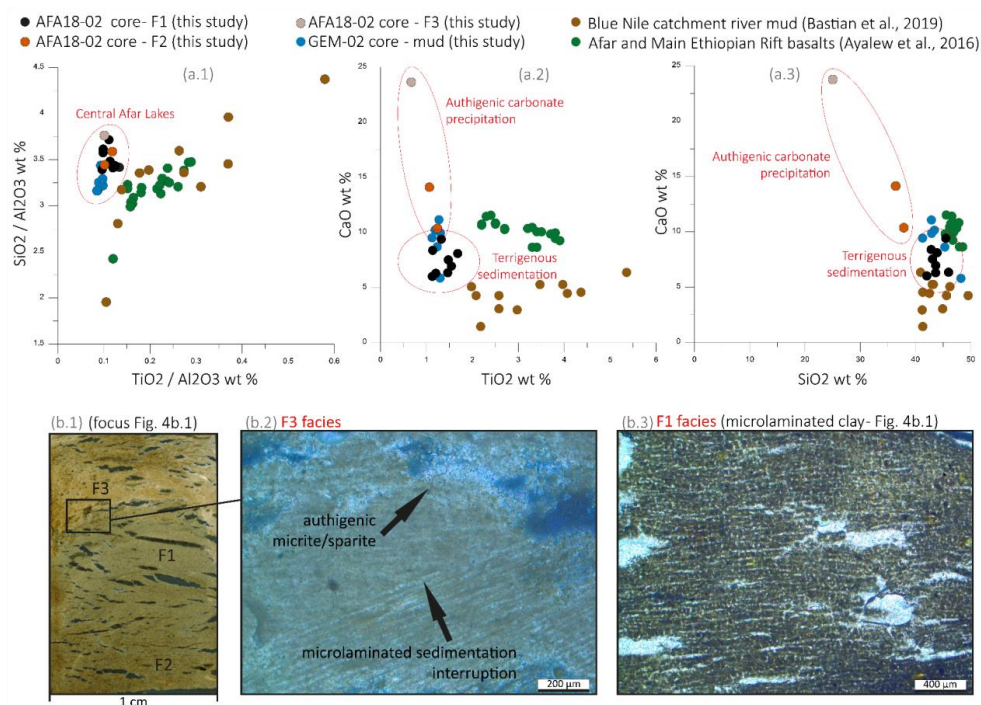

512

513 **Figure 7:** Geochemical and microscopic analyses and interpretation of F1, F2 and F3 facies: **a.1, 2, 3)** SiO<sub>2</sub>/TiO<sub>2</sub>, CaO/TiO<sub>2</sub>  
 514 and CaO/SiO<sub>2</sub> plots respectively, of Central Afar Lake sediments (black, orange and grey dots; This Study), Blue Nile  
 515 catchment river muds (green dots; Bastian et al., 2019) and Afar and Main Ethiopian Rift Basalts (brown dots; Ayalew et al.,  
 516 2016). **b.1)** Focus scan of this section 125-128 cm depth of AFA18-02 core (XPL); **b.2)** Microphoto of F3 facies (XPL); **b.3)**  
 517 Microphoto of F1 facies (PPL).



518 **5.1.2 – F2 interpretation**

519 The F2 and F3 facies appear to be enriched in CaO of ~5 wt% and ~24 wt%, respectively, and in Sr of  
520 ~800 ppm and ~1500 ppm, respectively, as a part of EM-2 of XRF PCA (Sup. Mat. C). Microscopically,  
521 such enrichment is observable in the precipitation of sparitic and micritic minerals, showing an  
522 interruption of the microlaminated structure typical of F1 (Fig. 7b.2), and suggesting a sedimentation  
523 mode and carbonated mineral formation disconnected from the Awash River terrigenous inputs and  
524 suspension/sedimentation of fine particles in the lake. Moreover, F2 and F3 are clearly disconnected  
525 from the regional mineralogical source cortege (Fig. 7a.2 and 7a.3), indicating how such minerals  
526 originate from the lacustrine authigenic activity. Under high evaporation conditions during the dry  
527 season, sparitic minerals can be produced directly by chemical or biogenic precipitation into the lake.  
528 Authigenic minerals precipitate when the evaporation rate exceeds the water inflow rate into the lake,  
529 leading to a switch from a terrigenous sedimentation pattern to the carbonate mineral precipitation mode.  
530 Considering high evaporation rates over the Lake Abhe basin (PE ~2000 mm/yr, Fig. 1E) which are  
531 concentrated during the dry season where there is low water inflow, authigenic precipitation of Ca and  
532 Sr can represent the direct results of highly saturated waters and the related evaporative processes  
533 (Cohen, 2003; Kylander et al., 2011; Martín-Puertas et al., 2011). Indeed, Ca and Sr are related to intra-  
534 lake precipitation of CaCO<sub>3</sub> with Sr and Ca substitution. This substitution occurs when the chemical  
535 concentration of lake waters reaches the point of carbonate saturation, as when lake waters are submitted  
536 to a lowering of lake levels (Cohen, 2003). Accordingly, lake surface analyses show that enriched Ca  
537 and Sr layers are concomitant with a lowering in Gemberi and Afambo lake levels (Fig. 6a.2).  
538 Consequently, F2 and F3 have been interpreted as the occurrence of the dry seasons along the Awash  
539 River catchment over the last 50 years, and Ca and Sr elemental values can be used as a marker of  
540 drought intensity.

541 **5.2 – Hydro-sedimentary mechanisms between Gemberi and Afambo Lakes**

542 Despite their proximity, Gemberi and Afambo Lakes present divergent patterns of sedimentation,  
543 suggesting interdependent and complementary hydro-mechanisms. Located on the prodeltaic front,  
544 Lake Gemberi is the first and main receiver of the Awash River waters and sediment, which then overflow  
545 into the Afambo basin (Fig. 1). Surprisingly, the <sup>210</sup>Pb activities of both lakes indicate a higher average  
546 sedimentation rate in Lake Afambo (~10 cm.yr<sup>-1</sup>) than in Lake Gemberi (~1.36 cm.yr<sup>-1</sup>).  
547 Lake Gemberi is characterized by a shallow water column (average of ~3 m depth measured during the  
548 coring and seismic reflection imagery acquisition) in which the extension of the proximal seismic facies  
549 into the central part of the basin is observed (Fig. 2). Such evidence suggests how the inputs of the  
550 inflow waters create sediment plumes that have expanded in three dimensions from the tributary mouth  
551 towards the basin floor. Furthermore, the main homogeneous (non-laminated) structure of the deposits  
552 (Fig. 5) suggests the input of continuous turbid currents (no variability in density) from the Awash River



553 waters. Such specific depositional patterns (~~deposit~~-spatial geometry and sedimentary structure) are  
554 attributable to homopycnal-like sedimentation, in which the density of the suspended sediment flow is  
555 equal to that of the lake water (Bates, 1953; Chapron et al., 2007). In the absence of water stratification,  
556 homopycnal conditions imply the homogeneous mixing of river and lake waters throughout the whole  
557 water column by advection processes (Ashley, 2002; Bates, 1953; Chapron et al., 2007). In terms of  
558 depositional processes, the occurrence of a homopycnal plume implies a short residence time of water  
559 and solid suspended loads in lake waters, leading to reduced sedimentation on the basin floor (Campos  
560 et al., 1989) and the development of contrasting sedimentation patterns between proximal and distal  
561 basins (Chapron et al., 2007, 2006). Accordingly, most of the solid load transits through Lake Gemeri,  
562 producing a low sedimentation rate and erosive facies observed from seismic profiles, which have not  
563 been recognized in the distal Lake Afambo basin. Furthermore, the shallow water patterns of Lake  
564 Gemeri (~3 m average water-column depth) can promote the re-suspension of the bottom lake sediments  
565 after the river floods or during wind-generated waves, reducing the sediment accumulation.

566 At 17 m water depth (coring site), Lake Afambo sediments show seasonal laminated structures (F1 and  
567 F2/3). Facies alternation as well as the microlaminated structure documented in the F1 layers (Fig. 7b.3)  
568 indicates the occurrence of rapid decantation processes shortly after each flood, thus suggesting slight  
569 water column stratification and a difference between freshwater inputs and lake water density. Particle  
570 sedimentation velocities calculated with the Stokes law confirm such observations, providing a mean of  
571 ~3 days for the particles to sediment in Afambo lake (Sup. Mat. E). Such sedimentary patterns combined  
572 with the absence of erosive or turbiditic events suggest a hypopycnal character of the inflow waters/solid  
573 load into Afambo Lake. Hypopycnal plume formation at the tributary mouth of Lake Afambo can be  
574 made possible by the decrease in the current energy flow and by the loss of density of the waterfront by  
575 the trapping of fine sediments into the deltaic marshes occurring between the two lakes (Fig. 1).  
576 Accordingly, the <3.9  $\mu\text{m}$  fraction is represented by 60-80% in Lake Gemeri and by 20-35% in Lake  
577 Afambo (Sup. Mat. J). Other factors that could influence the formation of hypopycnal plumes in Afambo  
578 Lake are the reduced energy flow into the lake waters due to the endorheic patterns of the basin (no  
579 outflow towards Lake Abhe) and a larger water-column depth.

580 The explanation of the general hydro-sedimentary modes of functioning of the two basins indicates **a**)  
581 a first prodeltaic basin (Gemeri) with lower sedimentation rates, dominated clayey texture, erosive  
582 processes and deltaic dynamics-dependant, which have recorded the general trends (decennial) of  
583 hydrological fluctuations of the Awash catchment over a long period (~700 yrs) in our study; **b**) a second  
584 distal basin (Afambo) with higher sedimentation rates, clayey texture and seasonal F1 and F2/3 deposits,  
585 which records in high-resolution (interannual) the hydrological fluctuations of the Awash River  
586 catchment during a short period (~50 yrs).

587



588 **5.3– Multi-centennial hydro-sedimentary trends from Lake Gemeri**  
 589 **sediments**

590 Similar to AFA18-02, PCA on XRF data of the Gemeri sequence (Fig. S6) show three main geochemical  
 591 end-members: the terrigenous one composed of Ti, Si, Al, K, Zr, Fe, Mn, and Mg; the evaporitic (Ca  
 592 and Sr); and the organic component (S and Br). Diachronic variations in these main components along  
 593 the GEM18-03/04 core allow us to define two kind of periods: “Humid pluriannual periods” are  
 594 characterized by high terrigenous content such as Ti from high water flow activity of the Awash River.  
 595 Contrastingly, “dryer pluriannual periods” are characterized by the enrichment of Ca and Sr element  
 596 values interpreted as evaporative processes as a result of higher evaporation and reduced water inflow  
 597 into the lakes (Fig. 8). Thanks to the composite short-lived radionuclides and palaeomagnetism age  
 598 model on the GEM18-03/04 sequence (Fig. 5b), we are able to discuss the general hydrological trends  
 599 (centennial resolution) for the period ranging between 1300 and 1964 CE.  
 600 Between 1300 and 1650 CE, relatively high and constant Ti/Ca ratio values were recorded (Fig. 5b.1).  
 601 This indicates how this period is characterized by high detrital inputs into the Lake Abhe basin, likely  
 602 induced by water inflow processes over the Awash River basin. Following a drop in Ti proxy between  
 603 1650 and 1750 CE, the catchment could have experienced a gradual increase in water and solid load  
 604 flow until 1979 CE, as deduced from the increase in Fe, Ti and Si elemental content. The last decade  
 605 (1968-1979 CE) is thus characterized by higher supplies compared to the following periods.  
 606 Geomorphologically, during this time, the Awash palaeo-delta was likely characterized by an  
 607 anastomosing river network pattern that fed the prodeltaic lakes and marshes from the southwest to the  
 608 northeast of the alluvial plain (Fig. 8a).  
 609

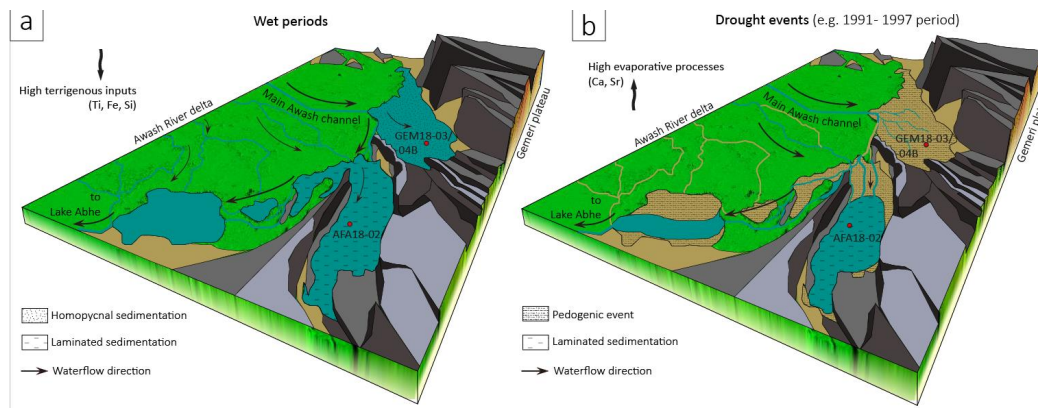

610

611 **Figure 8:** Schematic interpretative model of hydro-sedimentary patterns of the Awash River delta (including lakes Gemeri and  
 612 Afambo) during enhanced wet periods (a) and drought events (b).



613 **5.4 - ~50-year-long seasonal drought and flood chronicle from Lake**  
614 **Afambo**

615 In the AFA18-02 core, F1 and F2/F3 layers are interpreted as a result of the sedimentary interannual  
616 response of Central Afar Lake basins to wet and dry seasonal discharge of the Awash River. Thanks to  
617 the multi-proxy geochronological approach, we are able to propose a solid age model covering the  
618 period between 1969 AD and 2019 AD. The aim of this section is to provide a wet and dry season  
619 magnitude chronicle for the last ~50 years across the Awash River basin through **a**) the estimation of  
620 the wet season inflow intensity recognized in F1 layers and **b**) the estimation of drought/evaporitic  
621 process intensities recognized in dry season F2/F3 layers (see section §5.1 for the facies interpretation).  
622 With the aim of reconstructing the intensity of the Awash River wet season intensities, we selected two  
623 proxies: the grain size and the thickness of the F1 layers. Thanks to well-established published data, we  
624 are able to propose an interpretation of the river energy discharge based on the grain-size data (e.g.,  
625 Campbell, 1998; Lapointe et al., 2012; Parris et al., 2010; Sabatier et al., 2022, 2017; Wilhelm et al.,  
626 2015). Indeed, the coarse grain size fraction (Q90) has been successfully used to track hydrologic  
627 conditions, particularly the transport capacity and the stream velocity during flood events, such as the  
628 intensity of past floods (Gilli et al., 2013; Molinaroli et al., 2009; Parris et al., 2010). Similarly, previous  
629 studies interpret the thickness of flood deposits in lakes as the total volume of solid material transported  
630 and deposited during flood events (Jenny et al., 2014; Schiefer et al., 2011; Wilhelm et al., 2015, 2012).  
631 Assuming that the F1 layers are not the result of a unique flood event but the sum of flood events that  
632 occurred during the wet season, we can consider the F1 layer thickness and Q90 as proxies of the Awash  
633 discharge intensity in terms of flow energy and the volume of solid load that occurred during the wet  
634 monsoonal period between March and August. In our case, the striking similitudes between D90 peaks  
635 and thickness of F1 layers (Fig. 9b, c) confirms the combination of proxies for tracking the flood  
636 intensities.

637 To reconstruct the intensity of the dry season, we use Sr and Ca elements (Fig. 3) and the Ti/Sr elemental  
638 ratio (Fig. 9) as a marker of evaporative processes resulting from reduced water flow inputs, the  
639 contraction of the lake surface and high temperatures as explained in detail in section §5.1.2. The  
640 relationship between enhanced carbonate precipitation and drought intensity in Lake Afambo is evident  
641 in the F3 layer at 126 cm, corresponding to the 1997 CE dry season (Fig. 4), in which the highest Ca  
642 and Sr values recorded in the core correspond to the lowest lake level ever observed (Fig. 6) and the  
643 strongest impact of El Niño that has ever been historically recorded over East Africa (Fig. 9; Palmer et  
644 al., 2023).

645 The comparison between Ti/Sr, F1 thickness and D90 proxies (Fig. 9a, b and c) shows a strong  
646 relationship between physicochemical authigenic processes (carbonate precipitation and Sr enrichment  
647 linked to evaporative trends in the dry season) and the Awash River solid load inputs into the lake (linked  
648 to the increase or the reduction of water flow at the yearly scale). Consequently, we are able to discuss





649 the variability of the wet seasons and drought intensities in the Central Afar region over the last ~50  
650 years.

651 Between 1969 and 1979, a gradual increase in both F1 thickness and D90 indicates a decennial  
652 intensification of wet season **solid/liquid** Awash river discharge, with two years of demarcated wet  
653 season floods in 1976 and 1978. Decrease of Ti/Sr indicate an enhanced dry season in 1969, 1978 and  
654 1979. Between 1980 and 1990, a general and constant trend of high river discharge was recorded with  
655 enhanced floods in the 1981, 1982, 1988 and 1989 wet seasons. A pronounced drought was recorded in  
656 1983/1984.

657 From 1991 to 1997, the occurrence of an abrupt lowering thickness of F1 and low and constant D90  
658 indicate reduced river load inputs compared to the previous and following periods, suggesting a reduced  
659 river discharge intensity during the wet season. Such weak river discharge is in accordance with the  
660 lowest level recorded for Lake Afambo, the drying of Gemeri Lake (Fig. 6a.4) and high evaporative  
661 processes of lake waters (Sr peaks), especially between 1991 and 1997, highlighting the occurrence of  
662 the most severe drought period that has been recorded over the last ~50 years in the Central Afar Region.  
663 Between 1998 and 2010, constant Ti/Sr and increase of F1 thickness proxies indicate a gradual increase  
664 in river terrigenous inputs in relation to weak dry season drought intensities, except for two years of dry  
665 season droughts recorded in 2009 and 2010. The high variable D90 suggests the alternation between  
666 yearly high- and low-energy inflow, highlighting a **year-by-year hydrological instability** of the Awash  
667 River catchment for this period.

668 Since the 2010 wet season, the AFA18-02 sequence records a disproportionate increase in sedimentation  
669 rate (Fig. 6a.3) and in yearly solid load volume inputs (F1 thickness Fig. 9b), in concomitance with a  
670 reduced river energy discharge (low and constant D90) and an average lake water surface decrease of  
671 ~100 km<sup>2</sup> compared to the previous decade (Fig. 6). Such a hydro-sedimentary anomaly could be  
672 attributable to a strong anthropogenic impact such as that induced by the construction of the Tendaho  
673 Dam and the related Tendaho reservoir (Dereje et al., 2018; Yemane, 2008). Indeed, between 2010 and  
674 2014, the dam project included the reorganization of the hydrographic network of the Lower Awash  
675 plain with the massive development of irrigation channels, sugarcane cultivation and a sugar factory  
676 (corresponding to the alluvial plain area in Fig. 1B). The increase in solid load discharge could thus be  
677 linked to the disproportionate intensification of local soil erosion induced by artificial channel digging  
678 and agricultural exploitation of the lower Awash plain. Accordingly, the reduced river flow energy and  
679 lake surfaces are related to the water retention of the artificial Tendaho reservoir at the mouth of the  
680 Lower Awash plain. For this period, our geochemical and sedimentological data are not discussed in  
681 terms of regional climate-induced drought and flood intensities because they are partially disconnected  
682 from the regional hydrological dynamics of the Awash River catchment.

683

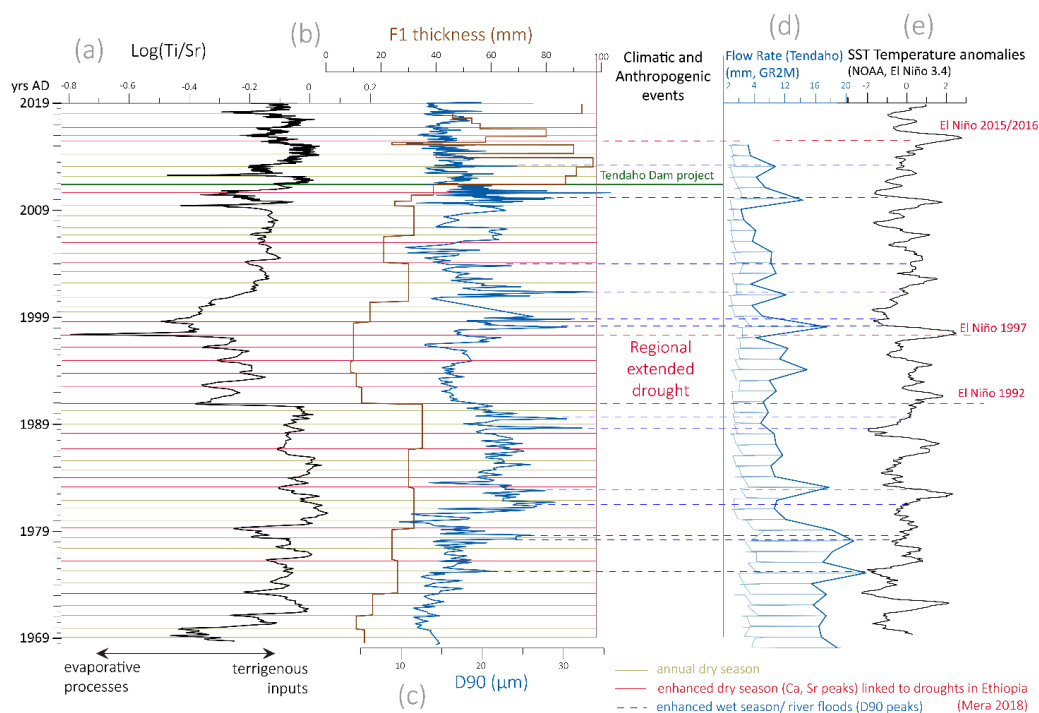

684

685 *Figure 9: Fifty years of Awash seasonal flood/drought magnitudes and their connection with ENSO events recorded in the*  
 686 *AFA18-02 sequence: a) Log(Ti/Sr) XRF ratio; b) F1 thickness; c) D90; d) water flow rate at Tendaho (mm, GR2M); e) SST*  
 687 *temperature anomalies (NOAA, El Niño 3.4) with indicated annual F2 laminae (dry season, yellow lines), enhanced dry*  
 688 *interannual events (red lines) and enhanced wet season/river flood periods (blue lines).*

689 **5.3 Magnitudes of the Awash River wet/drought seasons, and their**  
 690 **connection with the impacts of ENSO events**

691 Between March and August across Eastern Africa, the monsoonal rainy season is vital for agricultural  
 692 production and thus for national food security, especially in more susceptible areas such as along the  
 693 Rift Valley and over distal lowlands. During the last ~50 years, recurrent anomalous low and reduced  
 694 rainy seasons have had substantial environmental, humanitarian and economic impacts, including  
 695 agriculture and ecosystem sustainability (Palmer et al., 2023). Recent studies have highlighted how the  
 696 post-1960s period is characterized by global enhanced ENSO SST variability and magnitude related to  
 697 anthropogenic activities (rising CO<sub>2</sub> atmospheric concentrations and decreased sulfur aerosols; Cai et  
 698 al., 2023; Grothe et al., 2020). Post-1960 periods are thus marked by global increased variability features  
 699 evident in more frequent occurrences of strong El Niño and strong La Niña events (Cai et al., 2023). In  
 700 Ethiopia, the coincidence of enhanced ENSO episodes and droughts was recorded in 1965, 1972–73,  
 701 1982–83, 1986, 1991–93, 1997–98 and 2015–16 (Comenetz and Caviedes, 2002; Mera, 2018). In the  
 702 Horn of Africa, rainfall anomalies of ~100–250 mm year<sup>-1</sup> were documented in 1997, 2006, 2012, 2015  
 703 and 2019 and are associated with ENSO and IOD variability and socioeconomic crises (Nicholson,



704 [2017; Palmer et al., 2023; Spencer et al., 2005; Webster et al., 1999](#)). Today (until December 2023),  
705 ~22 million people are expected to confront acute food insecurity similar to the El-Niño-induced  
706 drought-affected areas of Djibouti, Ethiopia, Kenya and Somalia, and will face what is estimated to be  
707 the worst drought of the last 40 years ([FAO, 2023, 2022](#)).

708 Together with reduced anomalous precipitation during long rainy seasons, subsequent disproportionate  
709 short flood events were often recorded, and affected crop production as well as increasing the number  
710 of tropical disease outbreaks. For example, during the 1958/59 El Niño event, abnormally high  
711 temperature, floods, and relative humidity resulted in 3 million malaria cases across the Ethiopian  
712 highlands ([Fontaine et al., 1961](#)). During the El Niño of 1997-1998, exceptionally short heavy rains and  
713 floods affected food production and distribution networks throughout Eastern Africa. The floods caused  
714 extensive damage to crops, losses of large numbers of livestock and an increased incidence of cholera,  
715 malaria and rift valley fever linked to the lack of potable water in flooded areas ([Palmer et al., 2023](#)).  
716 The repetition of such events continues today as recorded in 2022, during which the meagre rainy season  
717 was followed by prolonged floods ([OCHA, 2022](#)).

718 In order to expand our knowledge base and mitigate difficulties with regards to future adaptation to such  
719 extreme changes, it is pivotal to fully understand not only Eastern African seasonal rainfall dynamics,  
720 but also regional to local hydraulic system feedbacks to ENSO flood and drought events.

721 East African atmospheric climate modes may operate concurrently between the Indian Ocean Dipole  
722 (IOD), South Atlantic SST and ENSO, making it difficult to understand the origin, magnitude and  
723 temporal variability of extreme droughts or flooding events ([Emerton et al., 2017; Ficchi et al., 2021](#)).  
724 Generally, the link between ENSO and IOD anomalies appears to be underestimated in model  
725 predictions for East African rainfall during strong El Niño periods ([MacLeod and Caminade, 2019](#)).  
726 Recent simulation studies have shown that it is difficult to estimate ENSO-induced flood and drought  
727 hazards in Sub-Saharan Africa as there are significant regional differences which are not sufficiently  
728 studied. Indeed, the Main Ethiopian Rift and the Awash River catchment areas are underrepresented in  
729 ENSO and IOD climate teleconnection models ([Ficchi et al., 2021](#)), reinforcing the importance of our  
730 data in the framework of current climatic anomaly studies.

731 The comparison between our wet/dry season intensity reconstruction, the flow rate modelling of the  
732 Awash River at Tendaho Lake, and the SST anomalies of the NOAA El Niño model allow us to discuss  
733 the high-resolution seasonal hydro-climate variability of the Awash River catchment in relation to El  
734 Niño atmospheric anomalies ([Fig. 9](#)).

735 We have observed a generally stronger drought in our record during El Niño years, which are known to  
736 be associated with low discharge, while La Niña years correspond with relatively high discharge ([Abteu  
737 et al., 2009; Amarasekera et al., 1997; Camberlin et al., 2001; De Putter et al., 1998; Eltahir, 1996; Wang  
738 and Eltahir, 1999; Zaroug et al., 2014; Fig. 9](#)). We have also observed that the occurrence of extreme  
739 wet season conditions at the onset of La Niña periods seems proportional to the gradient amplitude  
740 between positive and negative ENSO SST temperature anomalies, as is evident in 1998 ([Fig. 9](#)).



741 Accordingly, the D90 variability of the AFA18-02 core indicates the occurrence of high hydrological  
742 activity during 1975, 1978, 1981/82, 1988/89 years following El Niño-induced droughts documented in  
743 1975/76, 1978/79, 1982 and 1987/88 in Ethiopia (Mera, 2018). Overall, along the Afambo sequence, all  
744 major El Niño-induced droughts are systematically well recorded by our proxy of drought intensity (red  
745 lines Fig. 9; Mera, 2018).

746 High evaporation processes and low fluvial solid load inputs recorded in the AFA18-02 sequence  
747 suggest that along the Lower Awash valley, the period between 1991 and 1997 experienced the most  
748 extreme and continuous drought in the region of the last ~50 years (Fig. 9). In the Lake Abhe basin,  
749 such an event caused the complete drying of Lake Gemberi and a substantial lowering of Lake Afambo  
750 (Fig. 6b), suggesting loss of water capacity of the lower Awash plain agricultural fields. In East Africa,  
751 the 1997/1998 El Niño tended to have significant socio-economic and health impacts on populations  
752 even if it was not as extreme or as widespread as that of 1984 (Palmer et al., 2023). In contrast, the  
753 sedimentary record of the Afar lakes has revealed that the 1997 drought was more intense than the 1984  
754 drought. Such discrepancy can be attributable to strong regional variability, with particularly arid areas  
755 such as the Afar region being more impacted by drought than other East African regions. Accordingly,  
756 *United Nations Emergencies Unit for Ethiopia* reports highlight how the 1997 drought was particularly  
757 virulent in the Somali Regional state and the Afar, located in the southeast of the Horn of Africa (Borton,  
758 1997). As a result of low rains in 1996 and 1997, more than 275,000 people in the Afar Regional State  
759 were reported to be affected by drought.

760 At the scale of the Horn of Africa, 1997 is considered to have had socioeconomic impacts principally  
761 related to the La Niña flooding events. From October to December 1997, exceptionally heavy rains  
762 seriously affected food production throughout Eastern Africa (CARE, 1998; Nicholson, 2017).  
763 Accordingly, immediately after the extreme drought of the 1997 dry season, we observe a  
764 disproportionate increase in Awash River solid load inputs that were concomitant with La Niña (Fig. 9).  
765 From April 2016 to December 2017, the southeastern regions of the Horn of Africa experienced the  
766 strongest drought of the last ~40 years which have been linked to the El Niño 2015 event (MacLeod and  
767 Caminade, 2019; Mera, 2018). Even if modulated by the Tendaho dam, we observe three consecutive  
768 years of reduced sedimentation rates and unwanted evaporation processes from the Afambo sequence  
769 indicating that the lower Awash valley had been impacted by anomalously weak rainy seasons in 2015  
770 and 2016. In the nearby Somali region, such events triggered acute food shortages and malnutrition  
771 exacerbated by a shortage of potable water that led to disease outbreaks, which affected more than six  
772 million people (FSNAU, 2022; WBG, 2018).

773 The AFA18-02 sequence has been shown to be an exceptional record of anomalous hydrological events  
774 in the region, but quantitative data for regional to local climate change impacts are still lacking. Indeed,  
775 our record provides high-resolution wet season and drought magnitude records, highlighting some  
776 similarities and divergences compared to historical and instrumental records, which are necessary for  
777 the improvement of Eastern African climate prediction models. This data merits integration into models



778 to test different external forcings and large-scale climate teleconnections and feedbacks (vegetation,  
779 dust concentration, IOD, South Atlantic SST, relationship between ENSO and summer monsoon  
780 variability), which have affected inter-annual to multi-centennial hydrological variability in East Africa.

## 781 **6 Conclusion**

782 In this study, we have demonstrated that the hydro-sedimentary patterns of Central Afar Lakes  
783 (Ethiopia) are highly sensitive to changes in yearly precipitation over the Awash River catchment. Using  
784 a solid age model, sedimentological and geochemical proxies and microscopic observation on two  
785 lacustrine cores cross-referenced with a lake surface reconstruction model from satellite images and  
786 seismic imagery, we provide a high-resolution seasonal record of Awash River wet seasons/droughts  
787 covering the last ~50 years. Atmospheric anomalies linked to ENSO SST variability are the main factors  
788 determining hydrological instability over the Central Afar basin during the last fifty years in terms of  
789 flood hazards and drought periods. Between 1969 and 1989, our record shows increased wet season  
790 flood activity of the Awash River linked to La Niña, with a moderate impact of the 1984 El Niño on  
791 evaporative conditions in the Lake Abhe basin. Between 1991 and 1997, we highlight the occurrence of  
792 the strongest prolonged drought ever recorded in the Central Afar Lake region, and demonstrate  
793 similarities and divergences between our data and instrumental and historical drought records. This  
794 study provides new unpublished data on the impact of ENSO in the region and confirms the utility of  
795 this unique quantitative record for the improvement of future regional climate predictions. From a local  
796 perspective, we provide robust evidence to demonstrate how the construction of the Tendaho dam along  
797 the Awash River associated with extensive agricultural management, strongly affected the  
798 hydrosedimentary balance of the Lower Awash Valley from 2010, likely resulting in a disproportionate  
799 increase in local soil erodibility along the alluvial plain.

800 The reactivity of local to regional hydrology and soil to global changes remains understated in East  
801 African climatic models. This paper demonstrates the importance of studies on regional hydro-system  
802 feedbacks to global atmospheric anomalies, to better understand and mitigate the sometimes catastrophic  
803 effects of global warming in extreme environments such as the Afar, especially in the context of current  
804 climate-induced food insecurity in East Africa (2022-2023 season) and dire predictions for what is  
805 ahead.

806

## 807 **Code and Data availability**

808 The detailed core location and coring information are available on the Cyber Carothèque Nationale of  
809 CNRS (<https://cybercarotheque.fr/>). All analytical data presented in this manuscript are available in the  
810 Supplementary Material document.

811

812



813 **Author contribution**

814 **C. Mogni:** Conceptualization, Data curation, Formal analysis, Investigation, Supervision, Validation,  
815 Visualization, Writing – original draft preparation - review and editing.

816 **M. Revel:** Conceptualization, Funding acquisition, Investigation, Project administration,  
817 Supervision, Writing – original draft preparation– review & editing.

818 **E. Chaumillon:** Conceptualization, Investigation, Formal analysis, Data curation, Visualization,  
819 Writing– original draft preparation – review & editing.

820 **E. Malet:** Formal analysis, Investigation, Methodology, Resources.

821 **T. Coulombier:** Formal analysis, Investigation, Methodology, Resources.

822 **P. Sabatier:** Conceptualization, Data curation, Formal analysis, Investigation, Resources,  
823 Visualization, Writing– original draft preparation – review & editing.

824 **P. Brigode:** Conceptualization, Data curation, Formal analysis, Investigation, Writing– original draft  
825 preparation – review & editing.

826 **G. Hervé:** Conceptualization, Data curation, Formal analysis, Investigation, Visualization, Writing –  
827 original draft preparation – review & editing.

828 **A.-L. Develle:** Data curation, Formal analysis, Investigation, Methodology, Resources.

829 **L. Schenini:** Data curation, Formal analysis, Investigation.

830 **M. Messous:** Data curation, Formal analysis, Investigation, Methodology, Resources.

831 **G. Davtian:** Data curation, Formal analysis, Investigation, Methodology, Resources.

832 **A. Carré:** Formal analysis, Investigation, Methodology, Resources.

833 **D. Bosch:** Formal analysis, Methodology, Resources.

834 **N. Volto:** Conceptualization, Data curation, Formal analysis, Investigation, Writing – original draft  
835 preparation – review & editing.

836 **C. Méndard:** Project administration, Resources.

837 **L. Khalidi:** Conceptualization, Funding acquisition, Project administration, Supervision, Writing -  
838 review & editing.

839 **F. Arnaud:** Conceptualization, Investigation, Project administration, Data curation, Supervision,  
840 Ressources, Writing – original draft preparation– revie

841

842 **Competing Interests**

843 The authors declare that they have no conflict of interest

844

845 **Acknowledgements**

846 The CLIMAFAR (PIs: L. Khalidi & M. Revel) December 2018 coring operations were carried  
847 out in the framework of the VAPOR-Afar project (PI: L. Khalidi) with a permit granted by the

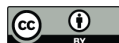

848 Ethiopian Authority for Research and Conservation of Cultural Heritage (ARCCH, Addis  
849 Ababa, Ethiopia) in collaboration with the Afar Bureau of Tourism & Culture. Funding for  
850 CLIMAFAR was granted by the French government, and managed by the Agence Nationale de  
851 la Recherche under the Investissements d'Avenir UCAJEDI project, reference no. ANR-15-  
852 IDEX-01 . XRF-Core Scanner and thin section fabrication were performed at the EDYTEM  
853 laboratory with funding from the CLIMAFAR grant. XRD analyses were funded by a  
854 University Cote d'Azur doctoral grant (C. Mogni). Radiocarbon dating was performed with  
855 funding from an ARTEMIS grant and support from the Geoazur laboratory (M. Revel) using  
856 the MICHADAS facilities (Christine Hatté; LSCE – UMR 8212 CEA-CNRS-UVSQ). The authors  
857 thank the Laboratoire Souterrain de Modane (LSM) facilities for the gamma spectrometry  
858 measurements and Environnement, Dynamique et Territoires de Montagne (EDyTeM) for the  
859 X-ray fluorescence analyses (A.-L. Develle). We would like to thank the Ethiopian ARCCH,  
860 the Afar Bureau of Tourism & Culture and the French Center for Ethiopian Studies (CFEE) for  
861 their authorization and support with regards to fieldwork and logistics. We also thank Dr.  
862 Tatiana Theodoropoulou and Dr. Lucie Coudert for the fish species determination of the  
863 AFA18-02 core sequence.

864

## 865 **References**

- 866 Abtew, W., Melesse, A.M., Dessalegne, T., 2009. El Niño Southern Oscillation link to the  
867 Blue Nile River Basin hydrology. *Hydrological Processes* 23, 3653–3660.  
868 <https://doi.org/10.1002/hyp.7367>
- 869 Amarasekera, K.N., Lee, R.F., Williams, E.R., Eltahir, E.A.B., 1997. ENSO and the natural  
870 variability in the flow of tropical rivers. *Journal of Hydrology* 200, 24–39.  
871 [https://doi.org/10.1016/S0022-1694\(96\)03340-9](https://doi.org/10.1016/S0022-1694(96)03340-9)
- 872 Arnaud, F., Poulenard, J., Giguët-Covex, C., Wilhelm, B., Révillon, S., Jenny, J.-P., Revel,  
873 M., Enters, D., Bajard, M., Fouinat, L., Doyen, E., Simonneau, A., Pignol, C.,  
874 Chapron, E., Vannière, B., Sabatier, P., 2016. Erosion under climate and human  
875 pressures: An alpine lake sediment perspective. *Quaternary Science Reviews* 152, 1–  
876 18. <https://doi.org/10.1016/j.quascirev.2016.09.018>
- 877 Arnaud, F., Sabatier, P., 2022. Lakes as Recorders of Earth Surface Dynamics From Yearly to  
878 Plurimillennial Time-Scales, in: Mehner, T., Tockner, K. (Eds.), *Encyclopedia of*  
879 *Inland Waters* (Second Edition). Elsevier, Oxford, pp. 439–452.  
880 <https://doi.org/10.1016/B978-0-12-819166-8.00125-0>
- 881 Arneitz, P., Leonhardt, R., Egli, R., Fabian, K., 2021. Dipole and Nondipole Evolution of the  
882 Historical Geomagnetic Field From Instrumental, Archeomagnetic, and Volcanic  
883 Data. *Journal of Geophysical Research: Solid Earth* 126, e2021JB022565.  
884 <https://doi.org/10.1029/2021JB022565>
- 885 Ashley, G.M., 2002. 11 - Glaciolacustrine environments, in: Menzies, J. (Ed.), *Modern and*  
886 *Past Glacial Environments*. Butterworth-Heinemann, Oxford, pp. 335–359.  
887 <https://doi.org/10.1016/B978-075064226-2/50014-3>

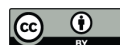

- 888 Ayalew, D., Jung, S., Romer, R.L., Kersten, F., Pfänder, J.A., Garbe-Schönberg, D., 2016.  
889 Petrogenesis and origin of modern Ethiopian rift basalts: Constraints from isotope and  
890 trace element geochemistry. *Lithos* 258–259, 1–14.  
891 <https://doi.org/10.1016/j.lithos.2016.04.001>
- 892 Bajard, M., Poulénard, J., Sabatier, P., Develle, A.-L., Giguët-Covex, C., Jacob, J., Crouzet,  
893 C., David, F., Pignol, C., Arnaud, F., 2017. Progressive and regressive soil evolution  
894 phases in the Anthropocene. *CATENA* 150, 39–52.  
895 <https://doi.org/10.1016/j.catena.2016.11.001>
- 896 Bajard, M., Sabatier, P., David, F., Develle, A.-L., Reyss, J.-L., Fanget, B., Malet, E., Arnaud,  
897 D., Augustin, L., Crouzet, C., Poulénard, J., Arnaud, F., 2016. Erosion record in Lake  
898 La Thuile sediments (Prealps, France): Evidence of montane landscape dynamics  
899 throughout the Holocene. *The Holocene* 26, 350–364.  
900 <https://doi.org/10.1177/0959683615609750>
- 901 Barberi, F., Varet, J., 1977. Volcanism of Afar: Small-scale plate tectonics implications. *Geol.*  
902 *Soc. Am. Bull.*, 88, 1251–1266.
- 903 Bastian, L., Vigier, N., Revel, M., Yirgu, G., Ayalew, D., Pik, R., 2019. Chemical erosion  
904 rates in the upper Blue Nile Basin and related atmospheric CO<sub>2</sub> consumption.  
905 *Chemical Geology* 518, 19–31. <https://doi.org/10.1016/j.chemgeo.2019.03.033>
- 906 Bates, C.C., 1953. RATIONAL THEORY OF DELTA FORMATION1. *AAPG Bulletin* 37,  
907 2119–2162. <https://doi.org/10.1306/5CEADD76-16BB-11D7-8645000102C1865D>
- 908 Beck, H.E., Wood, E.F., Pan, M., Fisher, C.K., Miralles, D.G., Dijk, A.I.J.M. van, McVicar,  
909 T.R., Adler, R.F., 2019. MSWEP V2 Global 3-Hourly 0.1° Precipitation:  
910 Methodology and Quantitative Assessment. *Bulletin of the American Meteorological*  
911 *Society* 100, 473–500. <https://doi.org/10.1175/BAMS-D-17-0138.1>
- 912 Bertin, X., Chaumillon, E., 2005. New Insights in Shallow Gas Generation from Very High  
913 Resolution Seismic and Bathymetric Surveys in the Marennes-Oléron Bay, France.  
914 *Mar Geophys Res* 26, 225–233. <https://doi.org/10.1007/s11001-005-3720-y>
- 915 Borton, J., 1997. Ethiopia Monthly Information Report Apr 1997. United Nations  
916 Emergencies Unit for Ethiopia (UN-EUE).
- 917 Borton, J., 7. Ethiopia Monthly Information Report March 1997. United Nations Emergencies  
918 Unit for Ethiopia.
- 919 Brown, M.C., Hervé, G., Korte, M., Genevey, A., 2021. Global archaeomagnetic data: The  
920 state of the art and future challenges. *Physics of the Earth and Planetary Interiors* 318,  
921 106766. <https://doi.org/10.1016/j.pepi.2021.106766>
- 922 Bruel, R., Sabatier, P., 2020. serac: an R package for ShortlivEd RADionuclide chronology of  
923 recent sediment cores. *Journal of Environmental Radioactivity* 225, 106449.  
924 <https://doi.org/10.1016/j.jenvrad.2020.106449>
- 925 Cai, W., Ng, B., Geng, T., Jia, F., Wu, L., Wang, G., Liu, Yu, Gan, B., Yang, K., Santoso, A.,  
926 Lin, X., Li, Z., Liu, Yi, Yang, Y., Jin, F.-F., Collins, M., McPhaden, M.J., 2023.  
927 Anthropogenic impacts on twentieth-century ENSO variability changes. *Nat Rev*  
928 *Earth Environ* 1–12. <https://doi.org/10.1038/s43017-023-00427-8>
- 929 Camberlin, P., Janicot, S., Pocard, I., 2001. Seasonality and atmospheric dynamics of the  
930 teleconnection between African rainfall and tropical sea-surface temperature: Atlantic  
931 vs. ENSO. *International Journal of Climatology* 21, 973–1005.  
932 <https://doi.org/10.1002/joc.673>
- 933 Campbell, C., 1998. Late Holocene Lake Sedimentology and Climate Change in Southern  
934 Alberta, Canada. *Quaternary Research* 49, 96–101.  
935 <https://doi.org/10.1006/qres.1997.1946>





- 936 Campos, H., Steffen, W., Agüero, G., Parra, O., Zuniga, L., 1989. Estudios limnológicos en el  
937 Lago Puyehue (Chile) : morfometría, factores físicos y químicos, plancton y  
938 productividad primaria. *Medio ambiente (Valdivia)* 10, 36–53.
- 939 Campuzano, S.A., Gómez-Paccard, M., Pavón-Carrasco, F.J., Osete, M.L., 2019. Emergence  
940 and evolution of the South Atlantic Anomaly revealed by the new paleomagnetic  
941 reconstruction SHAWQ2k. *Earth and Planetary Science Letters* 512, 17–26.  
942 <https://doi.org/10.1016/j.epsl.2019.01.050>
- 943 CARE, 1998. El Niño in 1997-1998: Impacts and CARE's Response.
- 944 Chapron, E., Ariztegui, D., Mulsow, S., Villarosa, G., Pino, M., Outes, V., Juvignié, E.,  
945 Crivelli, E., 2006. Impact of the 1960 major subduction earthquake in Northern  
946 Patagonia (Chile, Argentina). *Quaternary International, Holocene environmental  
947 catastrophes in South America: from the lowlands to the Andes* 158, 58–71.  
948 <https://doi.org/10.1016/j.quaint.2006.05.017>
- 949 Chapron, E., Juvigné, E., Mulsow, S., Ariztegui, D., Magand, O., Bertrand, S., Pino, M.,  
950 Chapron, O., 2007. Recent clastic sedimentation processes in Lake Puyehue (Chilean  
951 Lake District, 40.5°S). *Sedimentary Geology* 201, 365–385.  
952 <https://doi.org/10.1016/j.sedgeo.2007.07.006>
- 953 Cohen, A.S., 2003. *Paleolimnology: The History and Evolution of Lake Systems*. Oxford  
954 University Press.
- 955 Comenetz, J., Caviedes, C., 2002. Climate variability, political crises, and historical  
956 population displacements in Ethiopia. *Global Environmental Change Part B:  
957 Environmental Hazards* 4, 113–127. <https://doi.org/10.1016/j.hazards.2003.08.001>
- 958 Coron, L., Delaigue, O., Thirel, G., Dorchie, D., Perrin, C., Michel, C., 2022. airGR: Suite of  
959 GR Hydrological Models for Precipitation-Runoff Modelling (v. 1.7.0). airGR.
- 960 Coron, L., Thirel, G., Delaigue, O., Perrin, C., Andréassian, V., 2017. The suite of lumped  
961 GR hydrological models in an R package. *Environmental Modelling & Software* 94,  
962 166–171. <https://doi.org/10.1016/j.envsoft.2017.05.002>
- 963 Crouzet, C., Wilhelm, B., Sabatier, P., Demory, F., Thouveny, N., Pignol, C., Reyss, J.-L.,  
964 Magand, O., Jeltsch-Thömmes, A., Bajard, M., Augustin, L., Arnaud, F., 2019.  
965 Palaeomagnetism for chronologies of recent alpine lake sediments: successes and  
966 limits. *J Paleolimnol* 62, 259–278. <https://doi.org/10.1007/s10933-019-00087-z>
- 967 De Putter, T., Loutre, M.-F., Wansard, G., 1998. Decadal periodicities of Nile River historical  
968 discharge (A.D. 622–1470) and climatic implications. *Geophysical Research Letters*  
969 25, 3193–3196. <https://doi.org/10.1029/98GL02250>
- 970 Dereje, H., Daneal, S.F., Yenesew, M., Azage, G.Y., Tadesse, S., Naod, M., Tariku, A.,  
971 2018. The Study of Water Use and Treated Wastewater Discharge charge. Report on  
972 Charge System for Irrigation Water Abstraction and Use. Federal Democratic  
973 Republic of Ethiopia Awash Basin Authority.
- 974 Dosio, A., Jones, R.G., Jack, C., Lennard, C., Nikulin, G., Hewitson, B., 2019. What can we  
975 know about future precipitation in Africa? Robustness, significance and added value  
976 of projections from a large ensemble of regional climate models. *Clim Dyn* 53, 5833–  
977 5858. <https://doi.org/10.1007/s00382-019-04900-3>
- 978 Eltahir, E.A.B., 1996. El Niño and the Natural Variability in the Flow of the Nile River.  
979 *Water Resour. Res.* 32, 131–137. <https://doi.org/10.1029/95WR02968>
- 980 Emerton, R., Cloke, H.L., Stephens, E.M., Zsoter, E., Woolnough, S.J., Pappenberger, F.,  
981 2017. Complex picture for likelihood of ENSO-driven flood hazard. *Nat Commun* 8,  
982 14796. <https://doi.org/10.1038/ncomms14796>
- 983 FAO, 2023. Drought in the Horn of Africa: Progress report on the rapid response and  
984 mitigation plan to avert a humanitarian catastrophe (January–December 2022). FAO.  
985 <https://doi.org/10.4060/cc4218en>



- 986 FAO, 2022. Drought in the Horn of Africa – Rapid response and mitigation plan to avert a  
987 humanitarian catastrophe. FAO. <https://doi.org/10.4060/cb8280en>
- 988 FAO, 2000. The Elimination of Food Insecurity in the Horn of Africa – Summary Report.  
989 Rome.
- 990 Ficchi, A., Cloke, H., Neves, C., Woolnough, S., Coughlan de Perez, E., Zsoter, E., Pinto, I.,  
991 Meque, A., Stephens, E., 2021. Beyond El Niño: Unsung climate modes drive African  
992 floods. *Weather and Climate Extremes* 33, 100345.  
993 <https://doi.org/10.1016/j.wace.2021.100345>
- 994 Folk, R.L., Ward, W.C., 1957. Brazos River Bar: A Study in the Significance of Grain Size  
995 Parameters. *Journal Of Sedimentary Petrology* 27, 3–26.
- 996 Fontaine, R.E., Najjar, A.E., Prince, J.S., 1961. The 1958 malaria epidemic in Ethiopia. *Am J*  
997 *Trop Med Hyg* 10, 795–803. <https://doi.org/10.4269/ajtmh.1961.10.795>
- 998 Foucher, A., Chaboche, P.-A., Sabatier, P., Evrard, O., 2021. A worldwide meta-analysis  
999 (1977–2020) of sediment core dating using fallout radionuclides including  $^{137}\text{Cs}$  and  
1000  $^{210}\text{Pb}_{\text{xs}}$ . *Earth System Science Data* 13, 4951–4966. [https://doi.org/10.5194/essd-13-](https://doi.org/10.5194/essd-13-4951-2021)  
1001 [4951-2021](https://doi.org/10.5194/essd-13-4951-2021)
- 1002 FSNAU, 2022. Somalia FSNAU Food Security & Nutrition Quarterly Brief — Focus on Post  
1003 Gu 2017 Season Early Warning (Food Security and Nutrition Analysis Unit and  
1004 Famine Early Warning System Network, 2022). FSNAU.
- 1005 Garcia-Gil, S., Vilas, F., Garcia-Garcia, A., 2002. Shallow gas features in incised-valley fills  
1006 (Ría de Vigo, NW Spain): a case study. *Continental Shelf Research* 22, 2303–2315.  
1007 [https://doi.org/10.1016/S0278-4343\(02\)00057-2](https://doi.org/10.1016/S0278-4343(02)00057-2)
- 1008 Gilli, A., Anselmetti, F.S., Glur, L., Wirth, S.B., 2013. Lake Sediments as Archives of  
1009 Recurrence Rates and Intensities of Past Flood Events, in: Schneuwly-Bollschweiler,  
1010 M., Stoffel, M., Rudolf-Miklau, F. (Eds.), *Dating Torrential Processes on Fans and*  
1011 *Cones: Methods and Their Application for Hazard and Risk Assessment, Advances in*  
1012 *Global Change Research*. Springer Netherlands, Dordrecht, pp. 225–242.  
1013 [https://doi.org/10.1007/978-94-007-4336-6\\_15](https://doi.org/10.1007/978-94-007-4336-6_15)
- 1014 Grothe, P.R., Cobb, K.M., Liguori, G., Di Lorenzo, E., Capotondi, A., Lu, Y., Cheng, H.,  
1015 Edwards, R.L., Southon, J.R., Santos, G.M., Deocampo, D.M., Lynch-Stieglitz, J.,  
1016 Chen, T., Sayani, H.R., Thompson, D.M., Conroy, J.L., Moore, A.L., Townsend, K.,  
1017 Hagos, M., O’Connor, G., Toth, L.T., 2020. Enhanced El Niño–Southern Oscillation  
1018 Variability in Recent Decades. *Geophysical Research Letters* 47, e2019GL083906.  
1019 <https://doi.org/10.1029/2019GL083906>
- 1020 Haberzettl, T., Kirsten, K.L., Kasper, T., Franz, S., Reinwarth, B., Baade, J., Daut, G.,  
1021 Meadows, M.E., Su, Y., Mäusbacher, R., 2019. Using  $^{210}\text{Pb}$ -data and paleomagnetic  
1022 secular variations to date anthropogenic impact on a lake system in the Western Cape,  
1023 South Africa. *Quaternary Geochronology* 51, 53–63.  
1024 <https://doi.org/10.1016/j.quageo.2018.12.004>
- 1025 Hersbach, H., Bell, B., Berrisford, P., Hirahara, S., Horányi, A., Muñoz-Sabater, J., Nicolas,  
1026 J., Peubey, C., Radu, R., Schepers, D., Simmons, A., Soci, C., Abdalla, S., Abellan,  
1027 X., Balsamo, G., Bechtold, P., Biavati, G., Bidlot, J., Bonavita, M., De Chiara, G.,  
1028 Dahlgren, P., Dee, D., Diamantakis, M., Dragani, R., Flemming, J., Forbes, R.,  
1029 Fuentes, M., Geer, A., Haimberger, L., Healy, S., Hogan, R.J., Hólm, E., Janisková,  
1030 M., Keeley, S., Laloyaux, P., Lopez, P., Lupu, C., Radnoti, G., de Rosnay, P., Rozum,  
1031 I., Vamborg, F., Villaume, S., Thépaut, J.-N., 2020. The ERA5 global reanalysis.  
1032 *Quarterly Journal of the Royal Meteorological Society* 146, 1999–2049.  
1033 <https://doi.org/10.1002/qj.3803>
- 1034 Hua, Q., Barbetti, M., Rakowski, A.Z., 2013. Atmospheric radiocarbon for the period 1950-  
1035 2010.

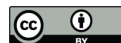

- 1036 IPCC, 2022. Working Group II contribution to the Sixth Assessment Report of the  
1037 Intergovernmental Panel on Climate Change.
- 1038 Jackson, A., Jonkers, A.R.T., Walker, M.R., 2000. Four Centuries of Geomagnetic Secular  
1039 Variation from Historical Records. *Philosophical Transactions: Mathematical,*  
1040 *Physical and Engineering Sciences* 358, 957–990.
- 1041 Jackson, M.L., 2005. Soil chemical analysis : advanced course : a manual of methods useful  
1042 for instruction and research in soil chemistry, physical chemistry of soils, soil fertility,  
1043 and soil genesis. Parallel Press, University of Wisconsin-Madison Libraries, [2005]  
1044 ©2005, Revised second edition. Madison, Wis.
- 1045 Jenny, J.-P., Wilhelm, B., Arnaud, F., Sabatier, P., Giguet Covex, C., Mélo, A., Fanget, B.,  
1046 Malet, E., Ployon, E., Perga, M.E., 2014. A 4D sedimentological approach to  
1047 reconstructing the flood frequency and intensity of the Rhône River (Lake Bourget,  
1048 NW European Alps). *J Paleolimnol* 51, 469–483. <https://doi.org/10.1007/s10933-014-9768-4>
- 1049
- 1050 Kidane, D., Mekonnen, A., Teketay, D., 2014. Contributions of Tendaho Irrigation Project to  
1051 the Improvement of Livelihoods of Agropastoralists in the Lower Awash Basin,  
1052 Northeastern Ethiopia. *Ethiopian e-journal for research and innovation foresight* 6, 1–  
1053 19.
- 1054 Kylander, M.E., Ampel, L., Wohlfarth, B., Veres, D., 2011. High-resolution X-ray  
1055 fluorescence core scanning analysis of Les Echets (France) sedimentary sequence:  
1056 new insights from chemical proxies. *Journal of Quaternary Science* 26, 109–117.  
1057 <https://doi.org/10.1002/jqs.1438>
- 1058 Lapointe, F., Francus, P., Lamoureux, S.F., Saïd, M., Cuven, S., 2012. 1750 years of large  
1059 rainfall events inferred from particle size at East Lake, Cape Bounty, Melville Island,  
1060 Canada. *J Paleolimnol* 48, 159–173. <https://doi.org/10.1007/s10933-012-9611-8>
- 1061 Lefebvre, P., Sabatier, P., Mangeret, A., Gourgiotis, A., Le Pape, P., Develle, A.-L., Louvat,  
1062 P., Diez, O., Reyss, J.-L., Gaillardet, J., Cazala, C., Morin, G., 2021. Climate-driven  
1063 fluxes of organic-bound uranium to an alpine lake over the Holocene. *Science of The*  
1064 *Total Environment* 783, 146878. <https://doi.org/10.1016/j.scitotenv.2021.146878>
- 1065 Lennard, C.J., Nikulin, G., Dosio, A., Moufouma-Okia, W., 2018. On the need for regional  
1066 climate information over Africa under varying levels of global warming. *Environ. Res.*  
1067 *Lett.* 13, 060401. <https://doi.org/10.1088/1748-9326/aab2b4>
- 1068 Li, C.-G., Zheng, Y., Wang, M., Sun, Z., Jin, C., Hou, J., 2021. Refined dating using  
1069 palaeomagnetic secular variations on a lake sediment core from Guozha Co,  
1070 northwestern Tibetan Plateau. *Quaternary Geochronology* 62, 101146.  
1071 <https://doi.org/10.1016/j.quageo.2020.101146>
- 1072 MacLeod, D., Caminade, C., 2019. The Moderate Impact of the 2015 El Niño over East  
1073 Africa and Its Representation in Seasonal Reforecasts. *Journal of Climate* 32, 7989–  
1074 8001. <https://doi.org/10.1175/JCLI-D-19-0201.1>
- 1075 Martín-Puertas, C., Valero-Garcés, B.L., Mata, M.P., Moreno, A., Giralt, S., Martínez-Ruiz,  
1076 F., Jiménez-Espejo, F., 2011. Geochemical processes in a Mediterranean Lake: a high-  
1077 resolution study of the last 4,000 years in Zoñar Lake, southern Spain. *Journal of*  
1078 *Paleolimnology* 46, 405–421. <https://doi.org/10.1007/s10933-009-9373-0>
- 1079 Marzin, C., Braconnot, P., 2009. The role of the ocean feedback on Asian and African  
1080 monsoon variations at 6kyr and 9.5kyr BP. *Comptes Rendus Geoscience* 341, 643–  
1081 655. <https://doi.org/10.1016/j.crte.2009.09.001>
- 1082 Mera, G.A., 2018. Drought and its impacts in Ethiopia. *Weather and Climate Extremes* 22,  
1083 24–35. <https://doi.org/10.1016/j.wace.2018.10.002>
- 1084 Molinaroli, E., Guerzoni, S., De Falco, G., Sarretta, A., Cucco, A., Como, S., Simeone, S.,  
1085 Perilli, A., Magni, P., 2009. Relationships between hydrodynamic parameters and

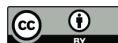

- 1086 grain size in two contrasting transitional environments: The Lagoons of Venice and  
1087 Cabras, Italy. *Sedimentary Geology* 219, 196–207.  
1088 <https://doi.org/10.1016/j.sedgeo.2009.05.013>
- 1089 Mologni, C., Bruxelles, L., Schuster, M., Davtian, G., Ménard, C., Orange, F., Doubre, C.,  
1090 Cauliez, J., Tazaz, H.B., Revel, M., Khalidi, L., 2021. Holocene East African  
1091 monsoonal variations recorded in wave-dominated clastic paleo-shorelines of Lake  
1092 Abhe, Central Afar region (Ethiopia & Djibouti). *Geomorphology* 391, 107896.  
1093 <https://doi.org/10.1016/j.geomorph.2021.107896>
- 1094 Mologni, C., Revel, M., Blanchet, C., Bosch, D., Develle, A.-L., Orange, F., Bastian, L.,  
1095 Khalidi, L., Ducassou, E., Migeon, S., 2020. Frequency of exceptional Nile flood  
1096 events as an indicator of Holocene hydro-climatic changes in the Ethiopian Highlands.  
1097 *Quaternary Science Reviews* 247, 106543.  
1098 <https://doi.org/10.1016/j.quascirev.2020.106543>
- 1099 Mouelhi, S., Michel, C., Perrin, C., Andréassian, V., 2006. Stepwise development of a two-  
1100 parameter monthly water balance model. *Journal of Hydrology* 318, 200–214.  
1101 <https://doi.org/10.1016/j.jhydrol.2005.06.014>
- 1102 Murray, H.D., 1975. *Melanoides tuberculata* (Müller), Las Morras Creek, Bracketville.  
1103 *Bulletin Of The American Malacological Union* 1, 43.
- 1104 Nash, J.E., Sutcliffe, J.V., 1970. River flow forecasting through conceptual models part I —  
1105 A discussion of principles. *Journal of Hydrology* 10, 282–290.  
1106 [https://doi.org/10.1016/0022-1694\(70\)90255-6](https://doi.org/10.1016/0022-1694(70)90255-6)
- 1107 Niang, I., Ruppel, O.C., Abdrabo, M.A., Essel, A., Lennard, C., Padgham, J., Urquhart, P.,  
1108 Adelekan, I., Archibald, S., Barkhordarian, A., Battersby, J., Chahed, M., Chatterjee,  
1109 M., Chidzie, C.T., Descheemaeker, K., Djoudi, H., Ebi, K.L., Fall, P.D., Fuentes, R.,  
1110 Garland, R., Harvey, B., Hayden, M., Hemp, A., Jobbins, G., Johnson, J., Lobell, D.,  
1111 Locatelli, B., Ludi, E., Naess, L.O., Ndebele-Murisa, M.R., Ndiaye, A., Newsham, A.,  
1112 Njai, S., Pauw, P., Pramova, E., Rakotondrafara, M.-L., Raleigh, C., Roberts, D.,  
1113 Schleyer, M.H., Victor, D., Vincent, K., Dube, P., Leary, N., Schulte-Uebbing, L.,  
1114 2014. Part B: Regional Aspects. Contribution of Working Group II to the Fifth  
1115 Assessment Report of the Intergovernmental Panel on Climate Change - Africa, in:  
1116 *Climate Change 2014: Impacts, Adaptation, and Vulnerability.*, Cambridge University  
1117 Press. Cambridge, United Kingdom and New York, NY, USA, pp. 1199–1265.
- 1118 Nicholson, S.E., 2017. Climate and climatic variability of rainfall over eastern Africa.  
1119 *Reviews of Geophysics* 55, 590–635. <https://doi.org/10.1002/2016RG000544>
- 1120 OCHA, 2022. Horn of Africa Drought: Regional Humanitarian Overview & Call to Action.  
1121 OCHA.
- 1122 Ólafsdóttir, S., Geirsdóttir, Á., Miller, G.H., Stoner, J.S., Channell, J.E.T., 2013.  
1123 Synchronizing Holocene lacustrine and marine sediment records using paleomagnetic  
1124 secular variation. *Geology* 41, 535–538. <https://doi.org/10.1130/G33946.1>
- 1125 Oudin, L., Hervieu, F., Michel, C., Perrin, C., Andréassian, V., Anctil, F., Loumagne, C.,  
1126 2005. Which potential evapotranspiration input for a lumped rainfall–runoff model?:  
1127 Part 2—Towards a simple and efficient potential evapotranspiration model for  
1128 rainfall–runoff modelling. *Journal of Hydrology* 303, 290–306.  
1129 <https://doi.org/10.1016/j.jhydrol.2004.08.026>
- 1130 Palmer, P.I., Wainwright, C.M., Dong, B., Maidment, R.I., Wheeler, K.G., Gedney, N.,  
1131 Hickman, J.E., Madani, N., Folwell, S.S., Abdo, G., Allan, R.P., Black, E.C.L., Feng,  
1132 L., Gudoshava, M., Haines, K., Huntingford, C., Kilavi, M., Lunt, M.F., Shaaban, A.,  
1133 Turner, A.G., 2023. Drivers and impacts of Eastern African rainfall variability. *Nat*  
1134 *Rev Earth Environ* 4, 254–270. <https://doi.org/10.1038/s43017-023-00397-x>



- 1135 Parris, A.S., Bierman, P.R., Noren, A.J., Prins, M.A., Lini, A., 2010. Holocene paleostorms  
1136 identified by particle size signatures in lake sediments from the northeastern United  
1137 States. *J Paleolimnol* 43, 29–49. <https://doi.org/10.1007/s10933-009-9311-1>
- 1138 Pekel, J.-F., Cottam, A., Gorelick, N., Belward, A.S., 2016. High-resolution mapping of  
1139 global surface water and its long-term changes. *Nature* 540, 418–422.  
1140 <https://doi.org/10.1038/nature20584>
- 1141 Rauch, S., Hemond, H.F., Brabander, D.J., 2006. High spatial resolution analysis of lake  
1142 sediment cores by laser ablation inductively coupled plasma-mass spectrometry (LA-  
1143 ICP-MS): Lake sediment cores by laser ablation-ICP-MS. *Limnol. Oceanogr. Methods*  
1144 4, 268–274. <https://doi.org/10.4319/lom.2006.4.268>
- 1145 Reyss, J.-L., Schmidt, S., Legeleux, F., Bonté, P., 1995. Large, low background well-type  
1146 detectors for measurements of environmental radioactivity. *Nuclear Instruments and*  
1147 *Methods in Physics Research Section A: Accelerators, Spectrometers, Detectors and*  
1148 *Associated Equipment* 357, 391–397. [https://doi.org/10.1016/0168-9002\(95\)00021-6](https://doi.org/10.1016/0168-9002(95)00021-6)
- 1149 Roussel, E.G., Sauvadet, A.-L., Allard, J., Chaduteau, C., Richard, P., Bonavita, M.-A.C.,  
1150 Chaumillon, E., 2009. Archaeal Methane Cycling Communities Associated with  
1151 Gassy Subsurface Sediments of Marennes-Oléron Bay (France). *Geomicrobiology*  
1152 *Journal* 26, 31–43. <https://doi.org/10.1080/01490450802599284>
- 1153 Sabatier, P., Moernaut, J., Bertrand, S., Van Daele, M., Kremer, K., Chaumillon, E., Arnaud,  
1154 F., 2022. A Review of Event Deposits in Lake Sediments. *Quaternary* 5, 34.  
1155 <https://doi.org/10.3390/quat5030034>
- 1156 Sabatier, P., Wilhelm, B., Ficetola, G.F., Moiroux, F., Poulenard, J., Develle, A.-L., Bichet,  
1157 A., Chen, W., Pignol, C., Reyss, J.-L., Gielly, L., Bajard, M., Perrette, Y., Malet, E.,  
1158 Taberlet, P., Arnaud, F., 2017. 6-kyr record of flood frequency and intensity in the  
1159 western Mediterranean Alps – Interplay of solar and temperature forcing. *Quaternary*  
1160 *Science Reviews* 170, 121–135. <https://doi.org/10.1016/j.quascirev.2017.06.019>
- 1161 Schiefer, E., Gilbert, R., Hassan, M.A., 2011. A lake sediment-based proxy of floods in the  
1162 Rocky Mountain Front Ranges, Canada. *J Paleolimnol* 45, 137–149.  
1163 <https://doi.org/10.1007/s10933-010-9485-6>
- 1164 Slivinski, L.C., Compo, G.P., Whitaker, J.S., Sardeshmukh, P.D., Giese, B.S., McColl, C.,  
1165 Allan, R., Yin, X., Vose, R., Titchner, H., Kennedy, J., Spencer, L.J., Ashcroft, L.,  
1166 Brönnimann, S., Brunet, M., Camuffo, D., Cornes, R., Cram, T.A., Crouthamel, R.,  
1167 Domínguez-Castro, F., Freeman, J.E., Gergis, J., Hawkins, E., Jones, P.D., Jourdain,  
1168 S., Kaplan, A., Kubota, H., Blancq, F.L., Lee, T.-C., Lorrey, A., Luterbacher, J.,  
1169 Maugeri, M., Mock, C.J., Moore, G.W.K., Przybylak, R., Pudmenzky, C., Reason, C.,  
1170 Slonosky, V.C., Smith, C.A., Tinz, B., Trewin, B., Valente, M.A., Wang, X.L.,  
1171 Wilkinson, C., Wood, K., Wyszyński, P., 2019. Towards a more reliable historical  
1172 reanalysis: Improvements for version 3 of the Twentieth Century Reanalysis system.  
1173 *Quarterly Journal of the Royal Meteorological Society* 145, 2876–2908.  
1174 <https://doi.org/10.1002/qj.3598>
- 1175 Spencer, T., Laughton, A.S., Flemming, N.C., Black, E., 2005. The relationship between  
1176 Indian Ocean sea–surface temperature and East African rainfall. *Philosophical*  
1177 *Transactions of the Royal Society A: Mathematical, Physical and Engineering*  
1178 *Sciences* 363, 43–47. <https://doi.org/10.1098/rsta.2004.1474>
- 1179 Syvitski, J., Ángel, J.R., Saito, Y., Overeem, I., Vörösmarty, C.J., Wang, H., Olago, D., 2022.  
1180 Earth’s sediment cycle during the Anthropocene. *Nat Rev Earth Environ* 3, 179–196.  
1181 <https://doi.org/10.1038/s43017-021-00253-w>
- 1182 Taddese, G., Sonder, K., Peden, D., 2010. THE WATER OF THE AWASH RIVER BASIN  
1183 A FUTURE CHALLENGE TO ETHIOPIA. report 14.
- 1184 Varet, J., 2018. *Geology of Afar (East Africa)*, Springer. ed, *Regional Geology Reviews*.

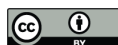

- 1185 Wang, G., Eltahir, E.A.B., 1999. Use of ENSO Information in Medium- and Long-Range  
1186 Forecasting of the Nile Floods. *Journal of Climate* 12, 1726–1737.  
1187 [https://doi.org/10.1175/1520-0442\(1999\)012<1726:UOEIIM>2.0.CO;2](https://doi.org/10.1175/1520-0442(1999)012<1726:UOEIIM>2.0.CO;2)  
1188 Ward, P.J., Eisner, S., Flörke, M., Dettinger, M.D., Kummerow, M., 2014. Annual flood  
1189 sensitivities to El Niño–Southern Oscillation at the global scale. *Hydrology and Earth  
1190 System Sciences* 18, 47–66. <https://doi.org/10.5194/hess-18-47-2014>  
1191 WBG, 2018. Somalia Drought Impact and Needs Assessment: Synthesis Report (World Bank  
1192 Group, 2018). World Bank Group.  
1193 Webster, P.J., Moore, A.M., Loschnigg, J.P., Leben, R.R., 1999. Coupled ocean-atmosphere  
1194 dynamics in the Indian Ocean during 1997–98. *Nature* 401, 356–360.  
1195 <https://doi.org/10.1038/43848>  
1196 Weltje, G.J., Tjallingii, R., 2008. Calibration of XRF core scanners for quantitative  
1197 geochemical logging of sediment cores: Theory and application. *Earth and Planetary  
1198 Science Letters* 274, 423–438. <https://doi.org/10.1016/j.epsl.2008.07.054>  
1199 Wilhelm, B., Arnaud, F., Sabatier, P., Crouzet, C., Brisset, E., Guiter, F., Reyss, J.L.,  
1200 Chaumillon, E., Tachikawa, K., Bard, E., Delannoy, J.J., 2012. 1.4 kyrs of flash flood  
1201 events in the Southern European Alps: implications for extreme precipitation patterns  
1202 and forcing over the north-western Mediterranean area 9097.  
1203 Wilhelm, B., Ballesteros Canovas, J.A., Corella Aznar, J.P., Kämpf, L., Swierczynski, T.,  
1204 Stoffel, M., Støren, E., Toonen, W., 2018. Recent advances in paleoflood hydrology:  
1205 From new archives to data compilation and analysis. *Water Security* 3, 1–8.  
1206 <https://doi.org/10.1016/j.wasec.2018.07.001>  
1207 Wilhelm, B., Rapuc, W., Amann, B., Anselmetti, F.S., Arnaud, F., Blanchet, J., Brauer, A.,  
1208 Czymzik, M., Giguet-Covex, C., Gilli, A., Glur, L., Grosjean, M., Irmeler, R., Nicolle,  
1209 M., Sabatier, P., Swierczynski, T., Wirth, S.B., 2022. Impact of warmer climate  
1210 periods on flood hazard in the European Alps. *Nat. Geosci.* 15, 118–123.  
1211 <https://doi.org/10.1038/s41561-021-00878-y>  
1212 Wilhelm, B., Sabatier, P., Arnaud, F., 2015. Is a regional flood signal reproducible from lake  
1213 sediments? *Sedimentology* 62, 1103–1117. <https://doi.org/10.1111/sed.12180>  
1214 Yemane, W., 2008. Challenges and Prospects of Commercial Agriculture Enterprise  
1215 Development and the Afar Pastoralists: The Case of Tendaho Dam and Irrigation  
1216 Project. Addis Ababa University, Addis Ababa.  
1217 Zaroug, M.A.H., Eltahir, E.A.B., Giorgi, F., 2014. Droughts and floods over the upper  
1218 catchment of the Blue Nile and their connections to the timing of El Niño and La Niña  
1219 events. *Hydrol. Earth Syst. Sci.* 18, 1239–1249. [https://doi.org/10.5194/hess-18-1239-  
1220 2014](https://doi.org/10.5194/hess-18-1239-2014)  
1221  
1222
